# Supplementary material for: Diffusion of knowledge and behaviours among trainee doctors in an acute medical unit and implications for quality improvement work: a mixed methods social network analysis
Source: PubMed Central journal article supplement — BMJ Open. 2019 Dec 10;9(12):e027039. doi: 10.1136/bmjopen-2018-027039 (PMC6924864; doi:10.1136/bmjopen-2018-027039), 2019-12-10
Supplement: bmjopen-2018-027039.draft_revisions.pdf [file bmjopen-2018-027039.draft_revisions.pdf]

# BMJ Open

BMJ Open is committed to open peer review. As part of this commitment we make the peer review history of every article we publish publicly available.

When an article is published we post the peer reviewers' comments and the authors' responses online. We also post the versions of the paper that were used during peer review. These are the versions that the peer review comments apply to.

The versions of the paper that follow are the versions that were submitted during the peer review process. They are not the versions of record or the final published versions. They should not be cited or distributed as the published version of this manuscript.

BMJ Open is an open access journal and the full, final, typeset and author-corrected version of record of the manuscript is available on our site with no access controls, subscription charges or pay-per-view fees (<http://bmjopen.bmj.com>).

If you have any questions on BMJ Open's open peer review process please email [info.bmjopen@bmj.com](mailto:info.bmjopen@bmj.com)

# BMJ Open

**The diffusion of knowledge and behaviours among trainee doctors in an acute medical unit and implications for quality improvement work. A mixed methods social network analysis.**

|                               |                                                                                                                   |
|-------------------------------|-------------------------------------------------------------------------------------------------------------------|
| Journal:                      | <i>BMJ Open</i>                                                                                                   |
| Manuscript ID                 | bmjopen-2018-027039                                                                                               |
| Article Type:                 | Research                                                                                                          |
| Date Submitted by the Author: | 24-Oct-2018                                                                                                       |
| Complete List of Authors:     | Sullivan, Paul; Imperial College, CLAHRC<br>Saatchi, Ghazal; Danone UK<br>Younis, Izaba; Imperial College, CLAHRC |
| Keywords:                     | INTERNAL MEDICINE, Change management < HEALTH SERVICES ADMINISTRATION & MANAGEMENT, MEDICAL EDUCATION & TRAINING  |
|                               |                                                                                                                   |

SCHOLARONE™  
Manuscripts

## Title Page

Title: The diffusion of knowledge and behaviours among trainee doctors in an acute medical unit and implications for quality improvement work. A mixed methods social network analysis.

Corresponding Author: Dr Paul Sullivan

CLAHRC for NW London  
Department of Primary Care and Public Health  
Imperial College London  
Chelsea and Westminster Hospital  
369 Fulham Rd\London SW10 9NH

[p.sullivan@imperial.ac.uk](mailto:p.sullivan@imperial.ac.uk)

0203 315 8144

### Authors:

Paul Sullivan, FRCP FRCP Ed MD MPH  
Department of Primary Care and Public Health  
Imperial College London  
Chelsea and Westminster Hospital  
369 Fulham Rd  
London SW10 9NH  
UK

Ghazaal Saatchi MSc  
Danone Ltd  
London, UK

Izaba Younis MPH  
Imperial College London  
Chelsea and Westminster Hospital  
369 Fulham Rd  
London SW10 9NH  
UK

### Keywords

**Acute internal medicine, change management, medical education and training, social network analysis**

**Wordcount: 3670**

1  
2  
3  
4  
5  
6  
7  
8  
9  
10  
11 Abstract  
12  
13

14 **Objectives:** The aim of this study is to analyse the social networks that transmit learning and  
15 influence relating to three domains of practice (clinical-technical knowledge, patient centred  
16 behaviour and and non-patient-facing practices) among trainee doctors acute medical teams,  
17 and describe the characteristics of highly influential individuals within those networks.  
18  
19  
20  
21  
22

23 **Design:** Mixed methods: i) sociocentric survey consisting of questions about which colleagues  
24 are emulated or looked to for advice and ii) interviews regarding sources of influence and the  
25 reasons certain people are influential. The study took place over 24 months.  
26  
27

28 **Setting:** An acute medical admissions unit, which receives admissions from the emergency  
29 department and primary care, in a London teaching hospital.  
30  
31  
32

33 **Participants:** Trainee medical doctors working in five consecutive rotational teams. Surveys –  
34 39 trainee doctors; interviews – 20 participants from a maximal diversity sample.  
35  
36

37 **Outcome measures:** Social network maps and metrics were derived from surveys and interviews  
38 were done and analysed using a grounded theory approach.  
39  
40  
41

42 **Results:** Memes in the three domains are transmitted in meaningfully different ways.  
43 Clinical-technical behaviours spread in a dense network with rich horizontal peer connections.  
44 Patient centred behaviours spread in a sparse network, with prominent vertically hierarchical  
45 flow. Approaches to non-patient facing work are seldom copied from colleagues. Influencers for  
46 clinical technical memes were identified. There were no individual high influencers for the other  
47 domains.  
48  
49  
50  
51  
52  
53  
54  
55  
56  
57  
58  
59  
60

1  
2  
3 **Conclusion:** Those aspiring to improve healthcare practices could benefit from applying  
4 knowledge of patterns of spread and characteristics of influencers in different ways for different  
5 behavioural domains.  
6  
7

8  
9  
10 **Article summary:**

11  
12  
13 **Strengths:**

14  
15  
16  
17 This paper is the first to map the social networks of learning and influence among professionals  
18 in an acute setting for three major domains of practice.  
19

20  
21  
22 The findings could be used to tailor the way that change is introduced in acute teams according  
23 to domain, and the way that colleagues can behave to influence change.  
24  
25

26  
27  
28  
29 **Limitations:**

30  
31  
32 The research was done in a single hospital, although several different consecutive teams were  
33 sampled. The findings may not reflect the situation in all acute units, which may have different  
34 local cultures.  
35  
36

37  
38  
39 The participants may not be aware of all the ways they are influenced, or may not be accustomed  
40 to reflecting on and describing their influencers.  
41  
42  
43  
44  
45  
46  
47  
48  
49  
50  
51  
52  
53  
54  
55  
56  
57  
58  
59  
60

1  
2  
3  
4  
5 **3670 words**  
6  
7

8 **Introduction**  
9

10  
11  
12 Innovators and leaders who aspire to improve the quality of healthcare care need to influence the  
13 practice of multidisciplinary professionals in clinical microsystems. (1) This might be achieved  
14 by exploiting the potential for ideas to spread spontaneously between connected individuals. It is  
15 known that established links within groups allow behaviours and information to diffuse  
16 contagiously in a range of contexts, including the clinical workplace. (2–4) These patterns of  
17 connections are termed social networks. The first study of social networks among health  
18 professionals was published in 1957 and social network analysis has been applied in a broad  
19 range of healthcare settings. (5,6) Most research has described a single network structure, either  
20 by analysing the spread of only one category of information, usually the clinical-technical  
21 domain, or not differentiating different kinds of information. In a systematic review of studies of  
22 networks among health professionals, there were twenty three identified papers; only one of  
23 these reported on transfer of more than one kind of knowledge.(5) That study, performed in an  
24 emergency department, showed different network topographies for communication regarding  
25 medication information and regarding general work related problems. (7)  
26  
27  
28  
29  
30  
31  
32  
33  
34  
35  
36

37  
38 Healthcare is complex, and its delivery depends on the coming together of different categories,  
39 or domains, of behaviour and knowledge. We categorised these as: i) technical/clinical (how to  
40 act to produce best clinical results), ii) patient centred (how to create better patient experience),  
41 and iii) administrative work-organisation (how to prioritise and conduct non patient-facing  
42 work). These domains were intended to map to the elements of quality of healthcare provision  
43 that are identified for continuous improvement in the English Health and Social Care Act (2012):  
44 The prevention, diagnosis and treatment of illness (technical-clinical); the experience of patients  
45 (patient centeredness); effectiveness of the service (work organisation). (8) The aim of this study  
46 was to determine whether memes relating to different practice domains spread through different  
47 network structures in a team, whether some individuals were more influential in spreading  
48  
49  
50  
51  
52  
53  
54  
55  
56  
57  
58  
59  
60

1  
2  
3 information in the three domains and what were the personal attributes of highly influential  
4 individuals.  
5  
6  
7

8 We used electronic surveys to map networks, followed by qualitative interviews for more in  
9 depth exploration. We conducted this research in six consecutive teams of trainee doctors  
10 rotating though in a single 48 bed acute medical admission unit (AMU). This is a ward that  
11 provides initial assessment and treatment for emergency general medical patients arriving from  
12 the emergency department or directly from primary care in the community.(9,10) We selected  
13 this setting because the trainee doctors in AMU have frequent exposure to complex and  
14 unfamiliar clinical conditions, as well as challenging communication scenarios (such as breaking  
15 bad news, end of life decisions and explaining life changing diagnoses) and so have many  
16 opportunities to learn 'on the job' from colleagues. There is a high intensity of non-patient-  
17 facing tasks, such as arranging tests and completing documentation, which incentivises trainees  
18 to find efficient ways of organizing their daily work. At the same time the trainees have access to  
19 a relatively large team of colleagues of different grades on any single day, and are exposed to a  
20 broad range of individuals during their rotation within AMU, which is in contrast to the  
21 traditional hospital model of small and stable medical firms. This means AMU trainees have a  
22 greater than usual opportunity to choose who emulate or to approach for advice.  
23  
24  
25  
26  
27  
28  
29  
30  
31  
32  
33  
34  
35

### 36 **Ethical Approval**

37  
38  
39 Ethical approval for this study was obtained from Hampshire-B REC; reference 15/SC/0052. All  
40 participants gave electronic or written informed consent.  
41  
42  
43

### 44 **Methods**

#### 45 Participants

46  
47  
48  
49  
50  
51 Participants were trainee doctors working full time in a single acute admission unit in an NHS  
52 university teaching hospital. Teams of approximately 20 doctors, from Foundation year (first  
53 two years after qualification) to specialist trainee level (approximately 5-10 years after  
54  
55  
56  
57  
58  
59  
60

1  
2  
3 qualification), rotate through the unit, the majority at four monthly intervals. The research was  
4 conducted in six consecutive teams. We used a mixed methods approach, with teams being  
5 invited to take part either in electronic surveys or interviews. All participants gave informed  
6 consent.  
7  
8  
9

### 10 11 12 Interviewers 13

14  
15 Two researchers conducted interviews. GS, research fellow, (female) had no prior contact with  
16 the teams; PS (male) was a consultant physician and had had some intermittent working contact  
17 with the participants. Both had previous experience of qualitative research at postgraduate level.  
18 There were no apparent differences between the findings from the interviews of the two  
19 researchers that would suggest bias introduced as a result of PS' previous contact and local role.  
20 Interviewers knew the results of the surveys that had been conducted previously, in particular,  
21 that a small proportion of team members had especially high numbers of connections. Beyond  
22 this, neither were aware of conscious preconceptions about the results, or the theories that would  
23 emerge.  
24  
25  
26  
27  
28  
29  
30  
31  
32  
33

### 34 Surveys 35

36  
37 We invited all trainees in two consecutive AMU teams to complete an electronic survey  
38 (Qualtrics, Provo, UT) when they had been working together for at least three months. The  
39 survey included questions about who they had asked for advice, who they would choose to  
40 approach in future, and who have they emulated or been influenced by in the AMU team. The  
41 questions were repeated for each of the three domains, clinical-technical, patient-centeredness  
42 and organising-work. Explanation was provided with examples to illustrate the domains. The  
43 surveys used a sociocentric approach and each question was accompanied by a list of all current  
44 trainee doctors in the acute medical team, and multiple selections were possible. Team members  
45 were invited to complete electronic surveys at team meetings; those who were not present were  
46 approached individually. Teams completed 19 and 20 surveys respectively.  
47  
48  
49  
50  
51  
52  
53  
54  
55  
56  
57  
58  
59  
60



## Interviews

Participants were trainee doctors in the acute unit. They were selected as a diversity sample, to include representatives at different stages of training and from different training schemes, from four separate rotational teams over two years. These were not teams who had completed surveys. Interviews were done in a private room, with only the participant and researcher(s) present. Interviews were recorded and transcribed as the project progressed, and observation notes were made after interviews. Interviews lasted 30-45 minutes.

Method of approach: For surveys, participants were invited at the end of routine team meetings to take part and were given a URL that they could access. Explanation was given, and they were told they could choose not to take part. For interviews, subjects were approached on a 1:1 basis in the workplace when not busy and invited to do a 30 minute interview at a time that was convenient for them. Consent was recorded for surveys and interviews.

The interviews sought insight into the ways respondents were influenced in their behaviour in the three domains, and the perceptions of characteristics of those who influenced them. We explored both advice seeking and emulation.

Interviews began with explanation of the domains, with examples. Participants were asked about times they had been influenced, and why they felt certain people had influenced them. Participants were asked to think about interaction during their time on AMU and also in previous jobs.

While there is existing literature that could be used to develop a theory regarding attributes of generic networks and of influencers in healthcare teams, there is no prior information that could be used to develop theory about the networks relating to individual information domains. We therefore used an inductive-deductive grounded theory approach, with theories emerging through the course of the research and developing theories were fed back in subsequent interviews for validation.(11) Theoretical analysis was done independently by two coders using

1  
2  
3 NVivo V11.4.1 software (QSR International Pty Ltd). Interviews continued until it appeared that  
4 theoretical saturation was achieved. Initial interview guides are appended.  
5  
6  
7

### 8 Non-participation 9

10 All those invited agreed to take part, and there were no withdrawals.  
11  
12

### 13 Patient and public involvement 14

15  
16  
17 Patients/public were not involved in this work, which was conducted entirely with NHS staff as  
18 subjects. Staff participants were invited to submit contact details so that they can be sent details  
19 of the publication of this research.  
20  
21  
22  
23

## 24 **Results:**

### 25 Surveys 26 27

28  
29  
30 Both surveyed teams returned similar network topography maps. Metrics for the first and second  
31 teams' networks, respectively, were as follow: For the clinical technical domain, the average  
32 number of people each individual influenced (average degree) was 3.7 and 3.5, and the number  
33 of connections as a proportion of the maximum possible (density) was 0.3 and 0.2. Equivalent  
34 values for the patient centred domain were lower, 0.4 and 0.6 for average degree and 0.03 and  
35 0.02 for density. Values for the communication of memes relating to non-patient facing work  
36 practice were 0.05 and 0.00 for average degree and 0.003 and 0.00 for density. Figures 1-3  
37 shows the network graphs for the three domains for one team.  
38  
39  
40  
41  
42  
43  
44

### 45 Interviews 46 47

48  
49 We conducted 15 interviews and consider that theoretical saturation was achieved. Participants  
50 were representative of the mix of levels of seniority within the team of trainees: 5 Foundation  
51 year (HO, US intern equivalent), 7 CT 1-3 (SHO, resident equivalent), 3 ST 4-7 (registrar,  
52  
53  
54  
55  
56  
57  
58  
59  
60

1  
2  
3 resident or fellow equivalent).

4  
5  
6  
7  
8 There was consensus among trainees that a significant proportion of their work practice was  
9 based on what they had learned from peers after qualifying from medical school, by observation  
10 or by seeking advice.  
11  
12

13  
14  
15 *“You learn a lot of theory in med school but actually when you get here things are done*  
16 *differently and you learn by seeing what people more senior do.” FYI*  
17  
18

19  
20  
21  
22 Domain 1: Technical-clinical; Diagnosing and treating.  
23

24  
25 Trainees stated they had largely learned from, and felt they would learn in the future from, only a  
26 subset of their peers. Major determinants of whether an individual had been or would be asked  
27 for advice or emulated by trainees, were i) their 'track record' of good practice, largely a record  
28 of visible successes, ii) conscientiousness and iii) approachability and kindness.  
29  
30

31  
32  
33 Approachability was described as the expectation of a positive experience for the trainee when  
34 asking for help, coupled with the amount of effort and explanation predicted to be provided.  
35

36  
37 There was a strong sense that some seniors would be approachable, and some not, and this was  
38 based on knowledge of their past behaviours. The anticipation of approachability was based not  
39 only on the way an individual had responded on the past to requests for help and advice, but also  
40 on how kind they were in general - to patients and to members of other disciplines. There was  
41 also a halo effect. Many participants expressed that they valued kindness toward patients, and  
42 therefore held kinder colleagues in higher esteem, and were more likely to trust and copy their  
43 technical practices. Absolute consistency in exhibiting kindness was also important.  
44  
45  
46  
47  
48

49  
50  
51 *“Someone who’s kind to patients and kind to everyone on the ward ..... that’s the kind of person*  
52 *I would copy.” CT2*  
53  
54  
55  
56  
57  
58  
59

1  
2  
3 *“I think, to be honest, the number one thing is kindness, yeh, kindness.” CT1*  
4  
5

6  
7 *“There’s definitely more approachable people who are going to be very helpful and won’t give*  
8 *you a hard time if you’ve forgotten things.” CT1*  
9

10  
11  
12 Pre-existing relationships were important. Several interviewees mentioned ‘friendship’ and  
13 ‘liking’ someone as being a determinant of clinical influence.  
14

15  
16  
17 Conversely, some people who are seen to be unapproachable, even if known as expert in a topic  
18 area, are unlikely to be asked for advice. People who were observed to provide a less than ideal  
19 patient experience were less likely to be seen as having competent technical skills, whatever their  
20 formal credentials.  
21  
22

23  
24  
25 Individuals who were seen as committed to doing their job well were likely to be emulated.  
26

27  
28  
29 *“Some work hard at being good at their job, you’ll walk in on them, like reading things on line*  
30 *just trying to keep on top of research and things, that kind of person I would be more inclined to*  
31 *copy.” CT2*  
32  
33

34  
35  
36 *“There are certain doctors, I like the way they go about the profession, I feel I could learn a lot*  
37 *by acting like them.” CT1*  
38  
39

40  
41  
42  
43 Characteristics of a clinical behaviour itself also determine if it will spread. A great deal of  
44 weight was placed on observable success. This might be a diagnostic success, a disease picked  
45 up by a test that could otherwise have been missed, or it could be a treatment, especially when a  
46 critically ill patient is seen to recover as a result. Higher level strategies, for example a diagnostic  
47 work up of a presentation, were widely seen as worth copying when they were comprehensive,  
48 or “thorough”, meaning that several possible diagnoses were considered, rather than the most  
49 likely. Thoroughness was generally perceived as safe practice, casting a wide diagnostic net and  
50  
51  
52  
53  
54  
55  
56  
57  
58  
59  
60

1  
2  
3 treating aggressively. When a colleague explained the logic behind a clinical approach, the  
4 trainees felt considerably more likely to incorporate it into their own practice.  
5  
6  
7

## 8 Domain 2: Providing good patient experience.

9  
10

11 All trainees expressed that they had never, and did not envisage that they would in future, ask for  
12 advice on how to interact with a patient. There was a feeling that this was a behaviour that  
13 should be determined by one's own personality and values.  
14  
15  
16

17  
18 When questioned about the ways that they could be influenced to behave differently toward  
19 patients, all trainees talked initially about communication skills. A consistent finding was that  
20 trainees regarded that learning occurred through their observation and selective acquisition of  
21 detailed approaches to communication: In particular, the detail of the way that conversations  
22 were worded and phrased. Trainees were anxious to improve the skills they could use in a  
23 number of 'set piece' communication situations, such as giving bad news and discussing end of  
24 life. They made conscious appraisals of the communication they observed, identifying good  
25 and bad practice, and deliberately copied snippets, to be used in their own practice in the future.  
26 They used what they regarded as bad communication as a lesson in what not to do.  
27  
28  
29  
30  
31  
32  
33  
34  
35

36 We explored what they meant by good and bad communication. A commonly cited criterion for  
37 good communication was successful outcome. Examples of success included the patient  
38 appearing to understand what they were being told, evidenced by verbal or non-verbal signals. A  
39 number cited as an example of success a patient being convinced to change their mind and accept  
40 a treatment that the doctor felt they should receive.  
41  
42  
43  
44  
45

46 In contrast to the clinical domain, personal characteristics of the person who was being observed  
47 was not perceived to impact on whether they would be copied.  
48  
49  
50

51 *"If I can see there's progress being made, personality is neither here or there, if goal has been*  
52 *achieved."* FY2  
53  
54  
55  
56  
57  
58  
59  
60

1  
2  
3 Going beyond learning about phrasing, we explored the influencing of values and attitudes  
4  
5 Many of the participants stated that they tended to select role models who had similar values to  
6  
7 their own. Trainees resonated with the idea that this introduced a degree of circularity, with the  
8  
9 role model used to reinforce but not challenge existing beliefs/behaviors.

10  
11 This led to exploration of: where do these underlying values come from in the first place?

12  
13 Trainees generally felt that the values that drive the way they interact with patients came from  
14  
15 outside the profession and pre-dated entry to medical school. Parental influence was mentioned  
16  
17 most often; trainees felt they carried the beliefs and behaviors that their parents displayed. Other  
18  
19 cited sources were school, social groups, personal development in response to exposure to life in  
20  
21 general and, in only one case, religious belief. None of their respondents cited specific ethical or  
22  
23 philosophical beliefs.

24  
25 Some motivators for patient centered behavior that were volunteered were egocentric rather than  
26  
27 truly compassionate, even though they led to seemingly altruistic actions: some wanted  
28  
29 predominantly to be seen as being kind, or to be respected by people who were similar to  
30  
31 themselves; other referred to the professional satisfaction of using good communication skills, or  
32  
33 the joy of feeling that one has gone an extra mile for a patient. No respondents referred to a  
34  
35 desire to improve the emotional state of the patient.

36  
37 Trainees were able to describe instances when they had been influenced to behave with kindness  
38  
39 after observing others. They particularly noticed small discretionary acts, examples given  
40  
41 included such as making tea for a patient, responding to a patient who is calling out for  
42  
43 attention, and making an effort to contact a patient's relatives. Several felt that they had behaved  
44  
45 differently after seeing somebody else put themselves out to provide good patient experience.

46  
47  
48 Some trainees discussed the way that observing negative patient centered behaviors could affect  
49  
50 them, and felt their behavior was adversely affected when the majority of a team were behaving  
51  
52 in a non patient-centred way. However, they felt that they were more strongly influenced by  
53  
54 seeing what they felt was good patient centered care, than bad. When local culture was contrary  
55  
56 to good care, they could be inspired for the good by the leadership of a single individual.

1  
2  
3  
4  
5 *“If someone said “hang on a minute let’s think about what more we can do for the patient”, I*  
6 *think definitely I’d stop and take a moment and think ‘is there more we can do ’” FY1*  
7  
8  
9  
10

### 11 Domain 3: organization of work

12

13  
14  
15 Trainees generally agreed that there were no personal characteristics that made an individual  
16 influential in terms of ways of organizing work.  
17

18  
19  
20 There was a sense of willingness to organize work differently if asked to do so but only by  
21 people who worked in the same clinical context and knew about how things worked. There was  
22 resistance to adapting practice in response to requests from people seen as outsiders, particularly  
23 managers.  
24  
25  
26

27  
28  
29 *...if its someone doing a similar job to you, I’d be inclined to try it, but if it was someone not*  
30 *from this environment, someone in a suit, someone who doesn’t do a job like this, my reaction*  
31 *to that would be “actually you don’t understand how busy this job is”. FY2*  
32  
33  
34

35  
36 There was a widespread sense that trainees could not make a difference to care by the way they  
37 organized their work because the system is so inflexible it tends to negate benefits of improving  
38 working practices.  
39  
40  
41

### 42 **Discussion:**

43

44  
45  
46  
47  
48 Previous research has shown that social networks are key factors for developing practice among  
49 trainee doctors. Information from peers can be as important for their learning as advice from  
50 consultants, and social network position can be a more powerful predictor of behaviour than  
51 formal training. (13,14) Knowledge about the function of networks among trainees offers  
52 important intelligence for those who aim to improve the quality of care within frontline clinical  
53  
54  
55  
56  
57  
58  
59

1  
2  
3 microsystems. Most existing studies of health professionals have mapped generic social  
4 networks. In the teams of medical trainees that we investigated, we found that there were  
5 different network structures channeling memes relating to different domains of practice. This is  
6 the first study to our knowledge that has investigated how information and influence in the  
7 three different domains of clinical-technical, patient centeredness and organization of work  
8 spread through networks in groups of doctors.  
9

10  
11  
12  
13  
14  
15 We found that clinical-technical knowledge flowed through dense networks with rich horizontal  
16 connections. This configuration can support efficient and spontaneous diffusion of innovations  
17 after introduction via a limited number of individuals. In contrast, the network conducting  
18 memes relating to patient-centeredness and patient experience was sparse, and where there was  
19 person to person transmission, it tended to be among isolated pairs of individuals with very few  
20 ongoing chains. Diffusion is likely to be limited and initiatives to improve behaviors in this  
21 domain might better be aimed at directly influencing most or all team members. Ways of  
22 organizing work were apparently hardly influenced at all by others, which is important  
23 information, as quality improvement initiatives frequently target the detail of working routines  
24 and practices. If this pattern is typical, then non patient facing practices cannot be relied upon to  
25 spread spontaneously.  
26  
27  
28  
29  
30  
31  
32  
33  
34  
35

36 Interviews provided triangulation for the survey finding of the existence of high clinical-  
37 technical influencers. Attributes of clinical-technical influencers included absolutely consistent  
38 kindness, and signs of conscientiousness. Trainees were more likely to emulate technical  
39 practices of individuals who explained the underlying logic clearly. An interesting finding was  
40 that trainees appraised clinical management on the basis of visible diagnostic or therapeutic  
41 success. This is important since many diagnostic strategies deliberately aim for low yields, and  
42 many treatments have a high 'number needed to treat': Therefore many correct management  
43 approaches have visible success only on rare occasions. This makes explanation of underlying  
44 logic all the more important in teaching.  
45  
46  
47  
48  
49  
50  
51  
52

53 In relation to the spread of patient centeredness, trainees did not identify highly influential  
54 individuals, and it was actions themselves were seen as more or less worthy of emulation.  
55  
56  
57  
58  
59  
60



1  
2  
3 Compassion, a concern for the impact of behaviors on the patients internal state was not  
4 volunteered as a driver. Instead, communication interactions were judged on the basis of ‘getting  
5 the job done’, for example, getting a message over accurately or getting the patient to agree with  
6 the doctor on a decision. The failure to talk about concern for the patient’s emotions may be an  
7 artefact of the kind of language used in professional life and may not reflect an absence of  
8 compassion. However, the findings point to a need for leaders to be explicit about behaving to  
9 improve patient experience and to demonstrate and teach shared decision making. An interesting  
10 finding was that trainees described that they looked to people they felt to be similar to  
11 themselves as their role models. Doctors felt they carried their own values from outside their  
12 professional life, and looked for validation, rather than looking to adopt new sets of values. If  
13 true, this has implications for those hoping to inculcate values among trainees.  
14  
15  
16  
17  
18  
19  
20  
21  
22  
23

24 Many of these findings are in keeping with existing literature. The presence of high influencers  
25 in healthcare teams is established. In keeping with our own results, the personality  
26 characteristics associated with this network influencing roles have been shown to include  
27 contentiousness and agreeableness.(15,16) The importance of perception of the utility of a  
28 practice, which we found to be key for adoption of ways of organizing work, is recognized in  
29 normalization process theory.(17)  
30  
31  
32  
33  
34  
35

36 We have added an extra dimension to existing knowledge of healthcare professional networks by  
37 differentiating and describing social networks that spread different kinds of work related  
38 information and influence in medical teams. This information can help change agents to adapt  
39 training and communication strategies according to the domain of practice being targeted. Our  
40 findings also provide insight into how an individual might adapt their own behavior so as to exert  
41 more influence.  
42  
43  
44  
45  
46  
47

48 This work has a number of limitations. It was conducted in a single center, and may not be  
49 representative of all acute settings, although in mitigation, six different consecutive clinical  
50 teams were included over a period of 2 years. We limited the research to trainee doctors, and did  
51 not include other professions; previous work has described the importance of networks that span  
52 professional groups and it would be interesting to go on to perform more inclusive studies. The  
53  
54  
55  
56  
57  
58  
59  
60

1  
2  
3 categorization of memes into three domains is pragmatic and certainly over simplistic, and there  
4 are many more subtle aspects that could have been explored.  
5  
6  
7

8 Conclusion: The social networks of influence and knowledge transfer among trainee doctors in  
9 an acute setting conform to quite different patterns when considering the spread of innovations in  
10 three domains, technical clinical, patient centered and self-organization. The attributes of  
11 strongly influential individuals and the characteristics of the interventions themselves that impact  
12 diffusion also differ for the different domains. Knowing how these coexisting networks are  
13 configured and driven is likely to be useful for those leading quality improvement work that  
14 requires on the uptake of innovative behaviors across a clinical microsystem.  
15  
16  
17  
18  
19  
20  
21  
22  
23

#### 24 **DISCLAIMER:**

25  
26  
27 This article presents independent research commissioned by the National Institute for Health  
28 Research (NIHR) under the Collaborations for Leadership in Applied Health Research and Care  
29 (CLAHRC) programme for North West London. The views expressed in this publication are  
30 those of the author(s) and not necessarily those of the NHS, the NIHR or the Department of  
31 Health.  
32  
33  
34  
35  
36  
37

38 **Contributor ship statement:** PS conceived the study; PS and GS collected data; PS, GS and IY  
39 all contributed to analysis and writing.  
40  
41  
42

43 **Competing interests:** no competing interests  
44  
45

46 **Funding:** PS is funded by Chelsea and Westminster NHS Foundation Trust and NIHR CLAHRC  
47 NW London; GS is funded by Danone Ltd; IY is funded by The Health Foundation, UK  
48  
49  
50

51 **Data sharing statement:** Data is not publicly available because a condition consent was that all  
52 interview and survey data would be destroyed after analysis.  
53  
54  
55  
56  
57  
58  
59  
60

## Figure Legends:

Figure 1: Network graph showing directed connections that conduct clinical-technical knowledge and influence. Square = CT4-7 grades (registrar), Circles = CT 1-3 (SHO), Diamonds = FY 1-2 (house officer).

Figure 2: Graph for network relating to the patient centred behaviours.

Figure 3: Graph for network relating to the non patient-facing practices.

## References

1. Nelson EC, Godfrey MM, Batalden PB, Berry SA, Bothe AE, McKinley KE, et al. Clinical microsystems, part 1. The building blocks of health systems. *Jt Comm J Qual Patient Saf Jt Comm Resour.* 2008;34:367–78.
2. Christakis N, Fowler JH. Social contagion theory: examining dynamic social networks and human behavior. *Stat Med.* 2013 Feb;32:556–77.
3. Wagter JM, van de Bunt G, Honing M, Eckenhausen M, Scherpbier A. Informal interprofessional learning: Visualizing the clinical workplace. *J Interprof Care.* 2012;26:173–82.
4. Rogers E. *Diffusion of Innovations.* New York: Free Press; 1983.
5. Chambers D, Wilson P, Thompson C, Harden M. Social network analysis in healthcare settings: A systematic scoping review. *PLoS ONE [Internet].* 2012 [cited 2018 Apr 7];7. Available from: <http://journals.plos.org/plosone/article?id=10.1371/journal.pone.0041911>
6. Coleman J KE MH. The diffusion of an innovation among physicians. *Sociometry. Stud Fam Plann.* 1957;20(4):253–70.
7. Creswick N, Westbrook JI, Braithwaite J. Understanding communication networks in the emergency department. *BMC Health Serv Res.* 2009;9:1–9.
8. Elizabeth II. *Health and Social Care Act.* 2012.
9. Acute Medicine Taskforce. *Acute medical care [Internet].* 2007 [cited 2018 Apr 7]. Report No.: 9781860163210. Available from:

1  
2  
3 [https://www.rcplondon.ac.uk/sites/default/files/documents/acute\\_medical\\_care\\_final\\_for\\_w](https://www.rcplondon.ac.uk/sites/default/files/documents/acute_medical_care_final_for_web.pdf)  
4 [eb.pdf](https://www.rcplondon.ac.uk/sites/default/files/documents/acute_medical_care_final_for_web.pdf)  
5

- 6
- 7
- 8 10. Bell D, Skene H, Jones M, Vaughan L. A guide to the acute medical unit. *Br J Hosp Med Lond Engl* 2005. 2008;69:107–9.
- 9
- 10 11. Heath H, Cowley S. Developing a grounded theory approach: a comparison of Glaser and  
11 Strauss. *Int J Nurs Stud*. 2004;41:141–50.
- 12
- 13 12. Cornelissen T, Dustmann C, Schönberg U. Peer Effects in the Workplace Peer Effects in  
14 the Workplace. 2013;(7617).
- 15
- 16 13. Jippes E, Achterkamp MC, Brand PLP, Kiewiet DJ, Pols J, van Engelen JML, et al.  
17 Disseminating educational innovations in health care practice: training versus social  
18 networks. *Soc Sci Med*. 2010;70:1509–17.
- 19
- 20 14. Shokoohi M, Nedjat S, Majdzadeh R. A social network analysis on clinical education of  
21 diabetic foot. *J Diabetes Metab Disord*. 2013;12:44–44.
- 22
- 23 15. Battistoni E, Fronzetti Colladon A. Personality correlates of key roles in informal advice  
24 networks. *Learn Individ Differ*. 2014;34:63–9.
- 25
- 26 16. Fong A, Clark L, Cheng T, Franklin E, Fernandez N, Ratwani R, et al. Identifying  
27 influential individuals on intensive care units: using cluster analysis to explore culture. *J*  
28 *Nurs Manag*. 2017;25:384–91.
- 29
- 30 17. Murray E, Treweek S, Pope C, Macfarlane A, Finch T, C. O, et al. Normalisation process  
31 theory: A framework for developing, evaluating and implementing complex interventions.  
32 *BMC Med*. 2010;8:2–11.
- 33
- 34
- 35
- 36
- 37
- 38
- 39
- 40
- 41
- 42
- 43
- 44
- 45
- 46
- 47
- 48
- 49
- 50
- 51
- 52
- 53
- 54
- 55
- 56
- 57
- 58
- 59
- 60

1  
2  
3  
4  
5  
6  
7  
8  
9  
10  
11  
12  
13  
14  
15  
16  
17  
18  
19  
20  
21  
22  
23  
24  
25  
26  
27  
28  
29  
30  
31  
32  
33  
34  
35  
36  
37  
38  
39  
40  
41  
42  
43  
44  
45  
46  
47  
48  
49  
50  
51  
52  
53  
54  
55  
56  
57  
58  
59  
60

For peer review only

1  
2  
3  
4  
5  
6  
7  
8  
9  
10  
11  
12  
13  
14  
15  
16  
17  
18  
19  
20  
21  
22  
23  
24  
25  
26  
27  
28  
29  
30  
31  
32  
33  
34  
35  
36  
37  
38  
39  
40  
41  
42  
43  
44  
45  
46  
47  
48  
49  
50  
51  
52  
53  
54  
55  
56  
57  
58  
59  
60

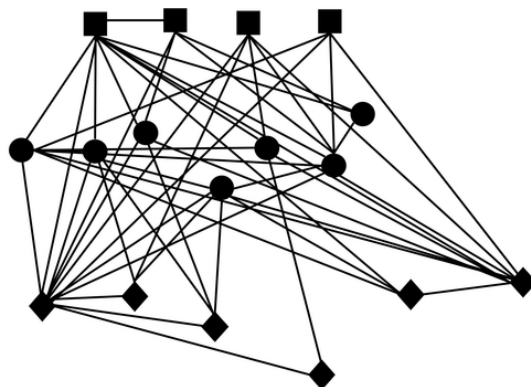

38x15mm (600 x 600 DPI)

1  
2  
3  
4  
5  
6  
7  
8  
9  
10  
11  
12  
13  
14  
15  
16  
17  
18  
19  
20  
21  
22  
23  
24  
25  
26  
27  
28  
29  
30  
31  
32  
33  
34  
35  
36  
37  
38  
39  
40  
41  
42  
43  
44  
45  
46  
47  
48  
49  
50  
51  
52  
53  
54  
55  
56  
57  
58  
59  
60

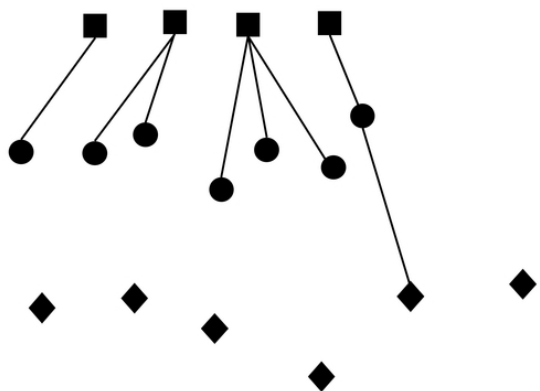

38x15mm (600 x 600 DPI)

1  
2  
3  
4  
5  
6  
7  
8  
9  
10  
11  
12  
13  
14  
15  
16  
17  
18  
19  
20  
21  
22  
23  
24  
25  
26  
27  
28  
29  
30  
31  
32  
33  
34  
35  
36  
37  
38  
39  
40  
41  
42  
43  
44  
45  
46  
47  
48  
49  
50  
51  
52  
53  
54  
55  
56  
57  
58  
59  
60

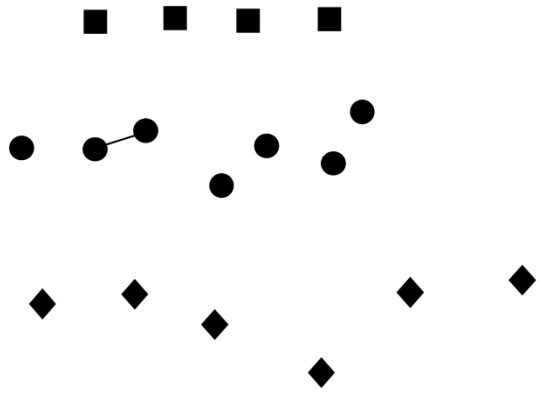



## Consolidated criteria for reporting qualitative research (COREQ): a 32-item checklist for interviews and focus groups

### Domain 1: Research team and reflexivity

#### Personal Characteristics

##### 1. Interviewer/facilitator:

- |    |                                                                    |    |
|----|--------------------------------------------------------------------|----|
| a- | An external researcher with no connection to the unit studied (GS) | p6 |
| b- | A researcher who occasionally works in the unit studied (PS)       | p6 |

##### 1. Credentials

- |     |        |    |
|-----|--------|----|
| a - | MSc    | p1 |
| b - | MPH MD | p1 |

##### 2. Occupation

- |      |                                           |    |
|------|-------------------------------------------|----|
| GS-  | research fellow                           | p6 |
| PS - | hon sen lecturer and consultant physician | p6 |

##### 3. Gender

- |     |        |    |
|-----|--------|----|
| GS- | female | p6 |
| PS- | male   | p6 |

##### 4. Experience and training

- |     |                                                            |    |
|-----|------------------------------------------------------------|----|
| GS- | experience of qualitative research at Masters level        | p6 |
| PS- | experience of qualitative research over in several studies | p6 |

##### 6. Relationship

- |     |                                                                                                                                                                                                                                     |    |
|-----|-------------------------------------------------------------------------------------------------------------------------------------------------------------------------------------------------------------------------------------|----|
| GS- | no previous relationship                                                                                                                                                                                                            | p6 |
| PS- | some previous contact with some participants; PS works as consultant on the acute unit on an intermittent basis and the participants would know his job role. He would have had some working contact with some of the participants. | p6 |

##### 7. Participant knowledge of the interviewer

- |    |                                                                          |    |
|----|--------------------------------------------------------------------------|----|
| a- | none                                                                     | p6 |
| b- | knowledge that PS is a consultant; only intermittent contact previously. | p6 |

##### 8. Interviewer characteristics

Interviewers knew the results of the surveys that had been conducted previously, in particular, that a small proportion of team members had especially high numbers of connections. Beyond this, neither were aware of conscious preconceptions about the results, or the theories that would emerge.

p6

## Domain 2: study design

9. Methodological orientation and Theory : While there is existing literature that could be used to develop a theory regarding attributes of generic networks and of influencers in healthcare teams, there is no prior information that could be used to develop theory about the networks relating to individual information domains. PS had worked in this environment but had no preconception about the attributes of networks or influencers for individual domains. We therefore used a grounded theory approach, with theories emerging through the course of the research. p7
10. Sampling for surveys was socio-centric; all team members were invited to participate. Sampling for interviews took a maximal diversity approach. The goal was to include trainees representing the range of levels, from first year after qualification to end of training (FY1 to ST7). p6
11. Method of approach: For surveys, participants were asked at the end of a team meeting to take part and were given a URL that they could access. Explanation was given, and they were told they could choose to not take part. Consent was collected as the first part of the survey. This was agreed by the ethics committee. For interviews, subjects were approached on a 1:1 basis and asked to do a 30 minute interview. Written consent was obtained. p7
12. Interviews continued until theoretical saturation was apparent; 15 interviews were done. Survey sample sizes were 19 and 20. p6
13. Non – participation: all subjects approached agreed to take part. p7
14. Setting: interviews were conducted in private rooms close to the workplace. p6
15. No one was present other than participant and researcher p6
16. Description of sample  
Interviews: 15 interviewees, all trainee doctors; 5 Foundation year (HO), 7 CT 1-3 (SHO), 3 ST 4-7 (registrar). p8
17. There were no repeat interviews
18. Audio recording followed by transcription was used. p7
19. Field notes were made after each interview p7
20. Interviews lasted 30-45 minutes p7
21. Theoretical saturation was reached. p8
22. Transcripts were not returned to participants

- 1
- 2
- 3
- 4 23. Two coders p7
- 5
- 6 24. Themes/theories were derived during the course of the interviews. p7
- 7
- 8 25. Software: NVivo 11.4.1 p7
- 9
- 10 26. Participants did not feed back on findings
- 11
- 12 27. Quotations are included and identified by level of training
- 13
- 14 28. We believe the findings are consistent with the data
- 15
- 16 29. Major themes are discussed pp13-15
- 17
- 18 30. Minor themes are discussed pp13-15
- 19
- 20
- 21
- 22
- 23
- 24
- 25
- 26
- 27
- 28
- 29
- 30
- 31
- 32
- 33
- 34
- 35
- 36
- 37
- 38
- 39
- 40
- 41
- 42
- 43
- 44
- 45
- 46
- 47
- 48
- 49
- 50
- 51
- 52
- 53
- 54
- 55
- 56
- 57
- 58
- 59
- 60

# BMJ Open

**The diffusion of knowledge and behaviours among trainee doctors in an acute medical unit and implications for quality improvement work. A mixed methods social network analysis.**

|                                 |                                                                                                                                                                                 |
|---------------------------------|---------------------------------------------------------------------------------------------------------------------------------------------------------------------------------|
| Journal:                        | <i>BMJ Open</i>                                                                                                                                                                 |
| Manuscript ID                   | bmjopen-2018-027039.R1                                                                                                                                                          |
| Article Type:                   | Original research                                                                                                                                                               |
| Date Submitted by the Author:   | 26-Apr-2019                                                                                                                                                                     |
| Complete List of Authors:       | Sullivan, Paul; Imperial College, CLAHRC<br>Saatchi, Ghazal; Danone UK<br>Younis, Izaba; Imperial College, CLAHRC<br>Harris, Mary; Chelsea and Westminster Healthcare NHS Trust |
| <b>Primary Subject Heading</b>: | Health services research                                                                                                                                                        |
| Secondary Subject Heading:      | Emergency medicine                                                                                                                                                              |
| Keywords:                       | INTERNAL MEDICINE, Change management < HEALTH SERVICES ADMINISTRATION & MANAGEMENT, MEDICAL EDUCATION & TRAINING                                                                |
|                                 |                                                                                                                                                                                 |

SCHOLARONE™  
Manuscripts

## Title Page

Title: The diffusion of knowledge and behaviours among trainee doctors in an acute medical unit and implications for quality improvement work. A mixed methods social network analysis.

Corresponding Author: Dr Paul Sullivan

CLAHRC for NW London  
Department of Primary Care and Public Health  
Imperial College London  
Chelsea and Westminster Hospital  
369 Fulham Rd\London SW10 9NH

[p.sullivan@imperial.ac.uk](mailto:p.sullivan@imperial.ac.uk)

0203 315 8144

Authors:

Paul Sullivan, Department of Primary Care and Public Health  
Imperial College London  
Chelsea and Westminster Hospital  
369 Fulham Rd  
London SW10 9NH  
UK

Ghazal Saatchi  
Danone Ltd  
London, UK

Izaba Younis  
Imperial College London  
Chelsea and Westminster Hospital  
369 Fulham Rd  
London SW10 9NH  
UKis

Mary Harris,  
Chelsea and Westminster NHS Foundation Trust,  
London

Keywords

Internal Medicine; Change Management, Medical Education and Training.

**Wordcount: 3670**

1  
2  
3  
4 **Abstract:**  
5

6 Abstract  
7  
8  
9

10 **Objectives:** To describe the social networks that diffuse knowledge, attitudes and  
11 behaviours relating to different domains of practice within teams of trainee doctors in an  
12 acute hospital medical setting. The domains examined were clinical-technical, patient  
13 centeredness and self-organisation of work.  
14  
15  
16

17  
18 **Design:** Sequential mixed methods: i) sociocentric survey of trainee consisting of questions  
19 about which colleagues are emulated or looked to for advice, with construction of social  
20 network maps, followed by ii) semi structured interviews regarding peer to peer influence,  
21 analysed using a grounded theory approach. The study took place over 24 months.  
22  
23  
24  
25

26  
27 **Setting:** An acute medical admissions unit, which receives admissions from the emergency  
28 department and primary care, in a UK NHS teaching hospital.  
29  
30  
31

32 **Participants:** Trainee medical doctors working in five consecutive rotational teams. Surveys  
33 were done by 39 trainee doctors; then 20 different participants from a maximal diversity  
34 sample were interviewed.  
35  
36  
37

38  
39 **Results:**

40  
41 Clinical-technical behaviours spread in a dense network with rich horizontal peer to peer  
42 connections. Patient centred behaviours spread in a sparse network. Approaches to non-  
43 patient facing work are seldom copied from colleagues. Highly influential individuals for  
44 clinical technical memes were identified; high influencers were not identified for the other  
45 domains.  
46  
47  
48  
49

50  
51 **Conclusion:** Information and influence relating to different aspects of practice have different  
52 patterns of spread within teams of trainee doctors; highly influential individuals were  
53 important only for spread of clinical-technical practice. Influencers have particular  
54 characteristics, and this knowledge could guide leaders and teachers.  
55  
56  
57  
58  
59  
60

## Limitations

The research was done in a single hospital and might not be generalisable.

The surveys and interviews could be subject to recall bias, and the interviews might be biased by the fact that one of the interviewers was a senior colleague.

We researched social networks within teams of trainee doctors; links to others outside these bounded groups might be as, or more, important.

1  
2  
3  
4  
5 **3907 words**  
6  
7

8 **Introduction**  
9

10  
11  
12 Doctors in training are important members of the clinical microsystems that deliver acute  
13 medical care.[1] The quality of that care is affected by the knowledge, attitudes and  
14 behaviours that they bring to bear. Despite long undergraduate training, many elements of  
15 real-world care can be under-represented in the formal curriculum, including broader patient  
16 centred behaviours, such as expressing compassion, shared decision making and providing  
17 good experience, and practical skills such as managing oneself and one's work. [2,3] There is  
18 recognition of the existence of an informal, or hidden postgraduate curriculum, which  
19 depends on 'on the job' contextual learning during real clinical practice, which has the  
20 potential to address gaps between what is taught and what knowledge is needed to do real  
21 world work.[4] Team members can be seen as part of a community of practice, negotiating  
22 everyday challenges together to developing collaborative competence in a complex social  
23 environment. [5,6] Learning from peers is an important and valued part of this experience. A  
24 national multispecialty survey of trainee doctors rated learning from other trainees as  
25 contributing more to their learning than lectures, tutorials and reading. [7] Attitudes,  
26 behaviours and information can spread across a group of individuals contagiously through  
27 peer to peer exchanges in a broad range of contexts, including clinical teams.[8-10]  
28 Knowledge of the patterns of these linkages, or social networks, could therefore facilitate the  
29 spread of best practice across clinical teams.[11]  
30  
31  
32  
33  
34  
35  
36  
37  
38  
39  
40  
41  
42  
43  
44

45 Trainee doctors require a range of kinds of skills to provide holistic, effective and efficient  
46 care. We hypothesis that information relating to different kinds of practice skills might be  
47 conducted through different network structures, that coexist in a single team. The aim of this  
48 research was to explore how knowledge, attitudes and behaviours diffuse between individuals  
49 through different network structures within similar bounded teams of trainee doctors in a  
50 particular organisational setting.  
51  
52  
53  
54

55  
56 The Institute for Healthcare Improvement promotes a widely accepted framework, the "triple  
57 aim" which divides healthcare outputs into population health, patient experience and  
58 efficiency.[12] We used this as the basis of a conceptual framework for different kinds of  
59  
60



1  
2  
3 skills of trainee doctors in an acute hospital. We considered population health as mapping to  
4 clinical-technical skills, patient experience to patient centred behaviours and efficiency  
5 with non patient facing skills such as good prioritisation and self-organisation.  
6  
7

8  
9  
10 We hypothesised that memes, (using the original meaning of a unit of knowledge, attitude or  
11 behaviour that can spread between individuals through communication or imitation) relating  
12 to the three domains of work may be conducted in different ways in a single team.[13] If  
13 this is the case, it may be necessary to use different approaches to dissemination of memes  
14 relating to different domains.  
15  
16  
17

18  
19  
20 We conducted the research among several different teams of trainee doctors a single acute  
21 medical unit (AMU). The AMU provides care for the initial 24-72 hours of an emergency  
22 medical hospital admission.[14,15] AMU trainees have access to a relatively large team of  
23 colleagues who they can approach for advice, or who's work they can observe. We  
24 constrained the research to interactions that occur in real time during work and did not  
25 explore use of electronic media. The study used a mixed methods sequential design, with  
26 surveys mapping network structures, followed by interviews with members from later teams  
27 that added to and triangulated the survey data and explored survey findings.  
28  
29  
30  
31  
32  
33  
34

### 35 **Ethical Issues**

36  
37  
38 Ethical approval for this study was obtained from Hampshire-B REC; reference 15/SC/0052.  
39 All participants gave informed consent.  
40  
41  
42

43  
44 One researcher (PS) was a consultant who spent some time working in the unit. We believe  
45 that the relationship between PS and the trainees was not such that participants would feel  
46 coerced. All trainees invited took part, we believe this is because we ensured participation  
47 was convenient.  
48  
49  
50

51  
52 The surveys asked people to name colleagues who were influential for them. We reassured  
53 participants that confidentiality would be maintained and survey data would in anonymized  
54 format.  
55  
56

### 57 **Methods**

## Participants

Participants were trainee doctors working in a single acute admission unit in an NHS hospital. Teams of doctors are allocated to the unit, at four to six monthly intervals. They are training in internal medicine, but they have different experiences and skills that they bring from previous roles. The research was conducted in five consecutive teams, each of approximately 20 trainee doctors, over a total period of 24 months. The first two teams completed electronic surveys, and the members of the following four teams participated in interviews.

## Surveys

We invited all trainees in two consecutive AMU teams to complete an electronic survey (Qualtrics, Provo, UT). The sociometric survey (supplementary file 1) included questions about who they had asked for advice, who they would choose to approach in future, and who have they emulated or been influenced by in the AMU team. The questions were repeated for each of the three domains and examples were given to illustrate the intended meaning of domains (supplementary file 2). Teams completed 19 and 20 surveys respectively. Survey responses were converted to unweighted directional edges and entered into SocNetV software to construct network graphs for each of the two teams, one graph for each work domain.

Method of approach: Participants were invited at the end of routine team meetings to take part by accessing the survey on their electronic devices.

## Interviews

Participants were selected as a maximum diversity sample, to include representatives at different stages of training to avoid bias. Subjects were approached on a 1:1 basis in the workplace invited to do an interview at a time convenient to them. All those invited agreed to take part.

1  
2  
3  
4  
5 Two researchers conducted interviews. GS, research fellow, (female) had no prior contact  
6 with the teams; PS (male) was a consultant physician and had had some intermittent working  
7 contact with the participants. Both had previous experience of qualitative research at  
8 postgraduate level. Coders agreed that there were no apparent differences between the  
9 findings from the interviews of the two researchers. PS as interviewer had preconception that  
10 highly influential individuals would be would be those with less patient centered attitudes.  
11 These preconceptions relate to PS's own training in the 1980s. Results were very different  
12 from these views, and we believe that these preconceptions did not cause bias. GS is a non  
13 clinical researcher and had no previous knowledge of acute medical practice.  
14  
15  
16  
17  
18  
19  
20  
21  
22  
23

24 Interviews were semi structured, and included vignettes to illustrate the meaning of the  
25 domains. Interview guides included questions about which colleagues were particularly  
26 influential, and what their characteristics were, in order to explore the finding of the presence  
27 of high influencers from the initial survey phase of the study. Interview guides are included  
28 (supplementary file 3).  
29  
30  
31  
32  
33

34 We were not aware of any existing literature on knowledge transfer and influence  
35 specifically related to different aspects of practice. We used the domains as a framework to  
36 guide interviews, but used an inductive-deductive grounded theory approach to develop novel  
37 theories about the ways that diffusion happened and the way that influencers were identified.  
38 Developing theories were fed back in subsequent interviews for triangulation.[16]  
39  
40  
41  
42  
43

44 Theoretical analysis was done independently by two coders using NVivo V11.4.1 (QSR  
45 International Pty Ltd). Coding was done after every 2-4 interviews. Themes that developed  
46 were incorporated as prompts into subsequent interviews. When items were coded differently  
47 the coders discussed these and reached consensus. Interviews continued until it appeared that  
48 theoretical saturation was achieved. Initial interview guides are appended.  
49  
50  
51  
52  
53

#### 54 Patient and public involvement

55

56  
57  
58  
59  
60 None.

## Results:

### Surveys

We found that clinical-technical knowledge flowed through dense networks with rich horizontal connections, (see figures 1-3). In contrast, the network conducting memes relating to patient-centeredness was sparse, and where there was person to person transmission, it tended to be among isolated pairs with no chains. Ways of organizing work were apparently hardly influenced at all by others. For the clinical technical domain, the average number of people each individual influenced (average degree) was 3.7 and 3.5 for team 1 and team 2, and the number of connections as a proportion of the maximum possible (density) was 0.3 and 0.2. Equivalent values for the patient centred domain were lower, 0.4 and 0.6 for average degree and 0.03 and 0.02 for density. Values for the communication of work organisation practice were 0.05 and 0.00 for average degree and 0.003 and 0.00 for density. Figures 1-3 show the network graphs for the three domains for team one; the graphs for team two showed similar topography. Some individuals showed network features of with high influencers. These were high degree centrality (the number of connections that an individual has) and betweenness centrality (the number of bridges an individual completes between others) which is associated with the ability to control information flow.[17]

### Interviews

We conducted 15 interviews and consider that theoretical saturation was achieved. Participants were representative of the mix of levels of seniority within the team of trainees: 5 Foundation year (house officer, US intern equivalent), 7 core or specialty trainees in year 1-3 (senior house officer, US resident equivalent), 3 core or specialty trainees 4-7 (registrar, resident or fellow equivalent); 9 were female, all had trained in UK medical schools.

High level theories that emerged were i) there were characteristics of actions that determined if they would be taken on board by a trainee, and ii) there were characteristics of people that

1  
2  
3 determined if their advice would be used or actions emulated; iii) some values and beliefs  
4 that influenced behaviour came from outside of work; iv) patterns of influencing differed  
5 between domains.  
6  
7  
8  
9

10  
11  
12 There was consensus among trainees that a significant proportion of their work practice was  
13 based on learning from peers.  
14  
15

16  
17 *“You learn a lot of theory in med school but actually when you get here things are done*  
18 *differently and you learn by seeing what people more senior or experienced do.” FYI*  
19  
20

### 21 22 Domain 1: Technical-clinical; Diagnosing and treating.

23

#### 24 25 Characteristics of influencers

26

27  
28 Chief determinants of individuals who were technical influencers were approachability and  
29 kindness, a record of visible successes and conscientiousness.  
30  
31

32  
33  
34  
35 Approachability was based not only on the way an individual had responded in the past to  
36 requests for help and advice, but also on how kind they were in general - to patients and to  
37 members of other disciplines; trainees predicted that people who were globally kind would be  
38 kind to them if they sought advice.  
39  
40  
41

42  
43  
44 *“my feeling is their empathy toward patients will be similar to their empathy toward me”*  
45  
46

47  
48 *“There’s definitely people who won’t give you a hard time. You can see how they are toward*  
49 *other people, nurse, patents.” CTI*  
50  
51

52  
53 Many participants expressed that they valued kindness toward patients for its own sake, and  
54 held kind colleagues in higher esteem, and were more likely to trust and copy their technical  
55 practices.  
56  
57  
58  
59  
60

1  
2  
3 *“I think, to be honest, the number one thing is kindness.”(referring to judging global*  
4 *competence) CT1*  
5  
6  
7

8 *“Someone who’s kind to patients and kind to everyone on the ward ..... that’s the kind of*  
9 *person I would copy in other ways.” CT2*  
10  
11  
12

13 Conversely,

14  
15  
16  
17 *“even if they’re, say, a brilliant diagnostician or surgeon, if I see someone behaving badly*  
18 *with a patient, I struggle to learn from them”*  
19  
20  
21

22  
23  
24 Trainees valued friendship and friendliness

25  
26  
27 *“if they’re pally, if you’ve chatted to them before, consider them friends, you’re likely to*  
28 *trust their knowledge and skills”*  
29  
30

31  
32  
33 *“I’m much more likely to copy the good bits in the people I’m already on good terms with*  
34 *who might be my friend”*  
35  
36  
37

38  
39  
40  
41 Individuals who were seen as committed to doing their job well were influencers.

42  
43  
44 *“Some work hard at being good at their job, you’ll walk in on them, like, reading things on*  
45 *line and things, that kind of person I would be more inclined to copy.” CT2*  
46  
47  
48

49  
50 *“There are certain doctors, I like the way they go about the profession, I feel I could learn a*  
51 *lot by acting like them.” CT1*  
52  
53

54  
55 Characteristics of actions and behaviours themselves could make them more likely to be  
56 emulated  
57  
58  
59  
60

1  
2  
3 A great deal of weight was placed on observable success. This might be an unlikely disease  
4 picked up by a test, or a treatment when a patient is seen to recover. Strategies such as  
5 diagnostic work up were valued when “thorough”, meaning that several possible diagnoses  
6 were considered and excluded. When a colleague explained the logic behind a clinical  
7 approach, the trainees were more likely to incorporate it.  
8  
9  
10  
11  
12

### 13 Domain 2: Providing good patient experience.

14  
15  
16

17 All trainees expressed that they had never, and did not envisage that they would in future, ask  
18 for advice on interpersonal interaction with a patient. There was a feeling that this was a  
19 behaviour that should be determined by one’s own values that largely came from outside the  
20 profession and often pre-dated medical school.  
21  
22  
23  
24

25 *“I think you come with ideas of how you’d like to be, how you’d like to speak to people”*  
26  
27

28 *“you’re taught a lot of science but you sort of come before that with an idea of how you want*  
29 *provide people with dignity and being honest and open, that’s the values I’ve had, it’s been*  
30 *long term ”*  
31  
32  
33  
34

35 *“I had that sort of preconceived idea from before I even came to medical school”*  
36  
37  
38

39 As a source of these values, parental influence was mentioned most often; trainees felt they  
40 carried the beliefs and behaviors that their parents displayed. Other cited sources were  
41 secondary school, social groups, exposure to life in general and, in only one case, religion.  
42  
43  
44  
45

46 *“Probably from parents, encouraging good values, I was just always told that’s the way to do*  
47 *it and eventually it becomes part of who you are”*  
48  
49  
50  
51

### 52 Characteristics of actions and behaviours

53  
54  
55

56 When questioned about the ways that they could be influenced at work to behave differently  
57 toward patients, all trainees talked about communication skills and learning through  
58  
59  
60

1  
2  
3 observing ways that conversations were phrased. Trainees wanted to improve skills in ‘set  
4 piece’ situations, such as end-of-life discussion. They copied snippets, to use in the future.  
5  
6  
7

8 We explored what they meant by good communication that they would emulate. A  
9 commonly cited criterion was a successful outcome. Examples of success included the  
10 patient appearing to understand what they were being told, evidenced by verbal or non-verbal  
11 signals. A number cited as an example of success a patient being convinced to change their  
12 mind and accept a treatment that the doctor felt they should receive.  
13  
14  
15  
16  
17

18 In contrast to the clinical domain, personal characteristics of the person who was being  
19 observed was not perceived to impact on whether they would be influential.  
20  
21  
22

23  
24 *“If I can see there’s progress being made, personality is neither here or there, if goal has  
25 been achieved.” FY2*  
26  
27

28  
29 Going beyond learning about phrasing, we explored the influencing of wider values and  
30 attitudes  
31  
32

### 33 34 CHARACTERISTICS OF PEOPLE 35

36  
37 Many participants tended to select role models who had similar values, with the role model  
38 used to reinforce existing beliefs/behaviors.  
39  
40  
41

42  
43 *“I guess I come to it with a kind and caring nature and one of the important things I look  
44 for in a role model is, do they have that too?”*  
45  
46

47  
48 *“there is a subconscious... why did I get into this and who do I deem also to be in for the  
49 right reasons, actually to help people and look after patients”*  
50  
51

52  
53 *“I guess, me, personally I’ve always been an all rounder, I see it’s important I have respect  
54 for an all rounder like me, that’s who I will look to; being kind is part of being an all  
55 rounder”*  
56  
57  
58  
59  
60



1  
2  
3 Trainees particularly noticed small discretionary acts, cited examples included making tea  
4 for a patient, responding to a patient who is calling out for attention, and making a special  
5 effort to contact a patient's relatives. Several felt that they had behaved differently after  
6 seeing somebody else put themselves out to provide good patient experience.  
7  
8  
9

10  
11  
12 *"If I see Dr X make someone a cup of tea I think I SHOULD try to be more like that, I*  
13 *SHOULD try to be better"*  
14

15  
16  
17 Some trainees discussed the way that observing negative patient centered behaviors could  
18 affect them, and felt their behavior was adversely affected when the majority of a team were  
19 behaving in a non-patient-centred way. However, they felt that they were more strongly  
20 influenced by seeing what they felt was good patient centered care, than bad. When local  
21 culture was contrary to good care, they could be inspired for the good by a single individual.  
22  
23  
24

25  
26  
27 *"If someone said "hang on a minute let's think about what more we can do for the patient", I*  
28 *think definitely I'd stop and take a moment and think "is there more we can do" FYI*  
29  
30  
31

32  
33  
34  
35  
36 Domain 3: organization of work  
37

38  
39 Trainees generally agreed that there were no personal characteristics that made an individual  
40 influential in terms of ways of organizing work.  
41  
42

43  
44 There was a sense of willingness to do work differently if asked to do so but only by people  
45 who worked in the same clinical context and knew about how things worked. There was  
46 resistance to adapting practice in response to requests from people seen as outsiders,  
47 particularly managers.  
48  
49  
50

51  
52  
53 *...if it's someone doing a similar job to you, I'd be inclined to try it, but if it was someone not*  
54 *from this environment, someone in a suit, someone who doesn't do a job like this, my*  
55 *reaction to that would be "actually you don't understand how busy this job is". FY2*  
56  
57  
58  
59  
60

1  
2  
3 *If a senior ward nurse asked me to do something this way, because it helped them, I'd be*  
4 *more likely,*  
5  
6  
7

8 There was a strong sense that an approach would have to be tested personally before  
9 adoption.  
10  
11

12  
13 *If someone did something, and it seemed to work, I'd try it to see if it worked, it wouldn't*  
14 *matter whether I looked up to that person or not*  
15  
16  
17

18  
19 There was a widespread feeling that trainees could not make a difference to care by the way  
20 they organized their work because the system is so inflexible it tends to negate benefits of  
21 improving working practices, and so it is not worth trying to improve one's efficiency.  
22  
23  
24  
25  
26

27 Discussion:  
28  
29  
30  
31

32 Social network analysis explores the way that individuals interact with social context, and  
33 how structures emerge from interpersonal interactions, increasing our understanding of  
34 behaviours. associated with leaning and performance in medical learning.<sup>17</sup>  
35  
36  
37  
38

39 Previous research has shown that social networks are key for developing practice among  
40 trainee doctors.[18,19] Knowledge about the function of networks among trainees offers  
41 important intelligence for those who aim to improve the quality of care within frontline  
42 clinical microsystems through training and influence. Most existing studies of health  
43 professionals have mapped generic social networks, without differentiating or identifying the  
44 type of information conducted.[20] In the teams of medical trainees that we investigated, we  
45 found that there were different network structures channeling memes relating to different  
46 domains of practice. This is the first study to our knowledge that has investigated how  
47 information and influence in the three different domains of clinical-technical, patient  
48 centeredness and organization of work spread through networks in groups of doctors.  
49  
50  
51  
52  
53  
54  
55  
56

57 We found that learning and influence in the different domains studied flowed very  
58 differently, if at all. Clinical-technical knowledge flowed through dense networks. In  
59  
60

1  
2  
3 contrast, the team networks relating patient centered items were sparse, with suggestion from  
4 interviews that there were important connections that went outside the team. Self  
5  
6 organisation appeared not to have any peer to peer spread. This suggests different strategies  
7  
8 might be needed for different domains, and passive diffusion is unlikely to achieve change in  
9  
10 practice for non-technical practices. This is important information because quality  
11  
12 improvement initiatives frequently target patient experience and the detail of working  
13  
14 routines and practices.

15  
16  
17 Interviews provided triangulation for the survey finding of the existence of high clinical-  
18  
19 technical influencers. Attributes of clinical-technical influencers included consistent  
20  
21 kindness, and signs of conscientiousness. An interesting finding was that trainees appraised  
22  
23 clinical management on the basis of visible diagnostic or therapeutic success. This is at odds  
24  
25 with the fact that many diagnostic strategies deliberately aim for low yields, and many  
26  
27 treatments have a high 'number needed to treat' or delayed outcomes: Therefore many  
28  
29 correct management approaches have visible success only on rare occasions. This makes  
30  
31 explanation of underlying logic important in teaching.

32  
33 In relation to the spread of patient centeredness, trainees did not identify highly influential  
34  
35 individuals, and it was actions themselves were seen as more or less worthy of emulation.  
36  
37 Compassion, a concern for the impact of behaviors on the patients internal psychological  
38  
39 state was not volunteered as a driver. Instead, communication interactions were judged on the  
40  
41 basis of 'getting the job done', for example, getting a message over accurately or getting the  
42  
43 patient to agree with the doctor on a decision. The failure to talk about concern for the  
44  
45 patient's emotions may be an artefact of the kind of language used day to day, and may not  
46  
47 reflect an absence of compassion. However, the findings point to a need for leaders to be  
48  
49 explicit about behaving to improve patient experience and to demonstrate and teach  
50  
51 approaches such as shared decision making. An interesting finding was that trainees  
52  
53 described that they looked to people they felt to be similar to themselves as their role  
54  
55 models. Doctors felt they carried their own values from outside their professional life, and  
56  
57 looked for validation, rather than looking to adopt new sets of values. If true, this has  
58  
59 implications for those hoping to inculcate values among trainees, suggesting that amplification  
60  
of existing mores may be more appropriate.

1  
2  
3 Many of these findings are in keeping with existing literature. The presence of high  
4 influencers in healthcare teams is established. In keeping with our own results, the  
5 personality characteristics associated with this network influencing roles have been shown to  
6 include conscientiousness and agreeableness.[21,22] The importance of perception of the  
7 utility of a practice, which we found to be key for adoption of ways of organizing work, is  
8 also described elsewhere.[23]  
9

10  
11  
12  
13  
14  
15 We have added an extra dimension to existing knowledge of healthcare professional  
16 networks by differentiating and describing social networks that spread different kinds of  
17 work related information and influence in medical teams. This can inform teaching and  
18 communication strategies according to the domain of practice being targeted. Our findings  
19 also provide insight into how an individual might adapt their own behavior so as to exert  
20 more influence.  
21  
22  
23  
24  
25

26  
27  
28  
29 This work has a number of limitations. It was conducted in a single center, and may not be  
30 representative of all acute settings, although in mitigation, six different consecutive clinical  
31 teams were included over a period of 2 years. We limited the research to trainee doctors, and  
32 did not include other professions; previous work has described the importance of networks  
33 that span professional groups and it would be interesting to go on to perform more inclusive  
34 studies. Future research could explore how individuals from outside of the core team and  
35 from different disciplines exert influence, and how electronic media provides wider peer to  
36 peer links. The categorization of memes into three domains is pragmatic and certainly over  
37 simplistic, and there are many more subtle aspects that could have been explored.  
38  
39  
40  
41  
42  
43  
44  
45

46  
47 Conclusion: The social networks of influence and knowledge transfer among trainee doctors  
48 in an acute setting conform to quite different patterns when considering the spread of  
49 innovations in three domains, technical clinical, patient centered and self-organization The  
50 characteristics and prevalence of highly influential individuals also differs between domains.  
51 This casts light on the way that practices develop across a team, informs those who wish to  
52 enhance their influencing, and emphasizes the importance of making desirable behaviors  
53 clearly visible to facilitate their spread. Knowing how these coexisting networks are  
54 configured and driven is likely to be useful for those leading quality improvement work that  
55 requires on the uptake of innovative behaviors across a clinical microsystem.  
56  
57  
58  
59  
60

1  
2  
3  
4  
5 This article presents independent research supported by the National Institute for Health  
6 Research (NIHR) under the Collaboration for Leadership in Applied Health Research and  
7 Care (CLAHRC) programme for Northwest London. The views expressed in this publication  
8 are those of the author(s) and not necessarily those of the NHS, the NIHR or the Department  
9 of Health and Social Care.  
10  
11  
12

13 **Contributor ship statement:** PS conceived the study; PS and GS collected data; PS, GS,  
14 MH and IY all contributed to analysis and writing.  
15  
16  
17

18  
19 **Competing interests:** no competing interests  
20  
21

22 **Funding:** PS is funded by Chelsea and Westminster NHS Foundation Trust and NIHR  
23 CLAHRC NW London; GS is funded by Danone Ltd; IY is funded by The Health  
24 Foundation, UK  
25  
26  
27  
28

29 **Data sharing statement:** Data is not publicly available because a condition consent was that  
30 all interview and survey data would be destroyed after analysis.  
31  
32  
33  
34  
35

### 36 **Figure Legends:**

37  
38

39 Figure 1: Network graph showing directed connections that conduct clinical-technical  
40 knowledge and influence. Square = CT4-7 grades (registrar), Circles = CT 1-3 (SHO),  
41 Diamonds = FY 1-2 (house officer).  
42  
43  
44  
45

46 Figure 2: Graph for network relating to the patient centred behaviours.  
47  
48

49 Figure 3: Graph for network relating to the non patient-facing practices.  
50  
51  
52  
53  
54  
55  
56  
57  
58  
59  
60

## References

1. Nelson EC, Godfrey MM, Batalden PB, Berry SA, Bothe AE, McKinley KE, et al. Clinical microsystems, part 1. The building blocks of health systems. *Jt Comm J Qual Patient Saf Jt Comm Resour.* 2008;34:367–78.
2. Fernandez A, Teherani A, Boscardin CK, Saba GW. Assessment of medical students' shared decision-making in standardized patient encounters. *J Gen Intern Med.* 2011;26:367-72
3. Burack JH, Irby DM, Carline JD, Root RK, Larson EB. Teaching compassion and respect; attending physicians' responses to problematic behaviors. *J Gen Intern Med.* 1999; 14:49-55
4. Swanwick T. Informal learning in postgraduate medical education: from cognitivism to 'culturism'. *Medical Education.* 2005; 39:859-865
5. Lingard L, McDougall A, Levstik M, Chandok M, Spafford MM, Schryer. Representing complexity well: a story about teamwork, with implications for how we teach collaboration. *Medical Education* 2012; 46: 869–877
6. Wenger, E. *Communities of Practice: learning, meaning and identity.* 1998 Cambridge, Cambridge University Press

- 1  
2  
3 7 DeWitt C, Baldwin DC, Daugherty SR. How Residents Say They Learn: A National,  
4 Multi-Specialty Survey of First- and Second-Year Residents. J Grad Med Educ. 2016;  
5 8: 631–639.  
6  
7  
8  
9  
10 8 Christakis N, Fowler JH. Social contagion theory: examining dynamic social networks  
11 and human behavior. Stat Med. 2013 Feb;32:556–77.  
12  
13  
14  
15  
16 9 Rogers E. Diffusion of Innovations. New York: Free Press; 1983.  
17  
18  
19  
20 10 Wagter JM, van de Bunt G, Honing M, Eckenhausen M, Scherpbier A. Informal  
21 interprofessional learning: Visualizing the clinical workplace. J Interprof Care.  
22 2012;26:173–82.  
23  
24  
25  
26  
27 11 Meltzer D , Chung J, Khalili P, Marlowa E, Arora V , Schumock G, Burt R. Exploring  
28 the use of social network methods in designing healthcare quality improvement  
29 teams. Soci(al Science & Medicine. 2010; 71: 1119-1130  
30  
31  
32  
33  
34 12 Institute for Healthcare Improvement. The triple aim.  
35 <http://www.ihl.org/Engage/Initiatives/TripleAim/Pages/default.aspx>. (Accessed  
36 18.4.19)  
37  
38  
39  
40  
41  
42 13 Distin, K. 2004. The Selfish Meme: A Critical Reassessment. Cambridge: Cambridge  
43 University Press. doi:10.1017/CBO9780511614286  
44  
45  
46  
47 14 Acute Medicine Taskforce. Acute medical care. 2007.  
48 [https://www.rcplondon.ac.uk/sites/default/files/documents/acute\\_medical\\_care\\_fi](https://www.rcplondon.ac.uk/sites/default/files/documents/acute_medical_care_fi)  
49 [nal\\_for\\_web.pdf](https://www.rcplondon.ac.uk/sites/default/files/documents/acute_medical_care_fi) (Accessed 7.4.19)  
50  
51  
52  
53  
54 15 Bell D, Skene H, Jones M, Vaughan L. A guide to the acute medical unit. Br J Hosp  
55 Med. 2008; 69:M107-9.  
56  
57  
58  
59  
60

- 1  
2  
3  
4  
5  
6  
7  
8  
9  
10  
11  
12  
13  
14  
15  
16  
17  
18  
19  
20  
21  
22  
23  
24  
25  
26  
27  
28  
29  
30  
31  
32  
33  
34  
35  
36  
37  
38  
39  
40  
41  
42  
43  
44  
45  
46  
47  
48  
49  
50  
51  
52  
53  
54  
55  
56  
57  
58  
59  
60
- 16 Heath H, Cowley S. Developing a grounded theory approach: a comparison of Glaser and Strauss. *Int J Nurs Stud.* 2004;41:141–50.
- 17 Isba R, mWoolf K, Hanneman R. Social network analysis in medical education. *Medical Education* 2017: 51: 81–88
- 18 Shokoohi M, Nedjat S, Majdzadeh R. A social network analysis on clinical education of diabetic foot. *J Diabetes Metab Disord.* 2013;12:44–44.
- 19 Jippes E, Achterkamp MC, Brand PLP, Kiewiet DJ, Pols J, van Engelen JML, et al. Disseminating educational innovations in health care practice: training versus social networks. *Soc Sci Med.* 2010;70:1509–17.
- 20 Chambers D, Wilson P, Thompson C, Harden M. Social network analysis in healthcare settings: A systematic scoping review. *PLoS ONE.* 2012 [cited 2018 Apr 7];7. Available from:<http://journals.plos.org/plosone/article?id=10.1371/journal.pone.0041911> (Accessed 10.4.19)
- 21 Battistoni E, Fronzetti Colladon A. Personality correlates of key roles in informal advice networks. *Learn Individ Differ.* 2014;34:63–9.
- 22 Fong A, Clark L, Cheng T, Franklin E, Fernandez N, Ratwani R, et al. Identifying influential individuals on intensive care units: using cluster analysis to explore culture. *J Nurs Manag.* 2017;25:384–91.
- 23 Murray E, Treweek S, Pope C, Macfarlane A, Finch T, C. O, et al. Normalisation process theory: A framework for developing, evaluating and implementing complex interventions. *BMC Med.* 2010;8:2–11.



1  
2  
3  
4  
5  
6  
7  
8  
9  
10  
11  
12  
13  
14  
15  
16  
17  
18  
19  
20  
21  
22  
23  
24  
25  
26  
27  
28  
29  
30  
31  
32  
33  
34  
35  
36  
37  
38  
39  
40  
41  
42  
43  
44  
45  
46  
47  
48  
49  
50  
51  
52  
53  
54  
55  
56  
57  
58  
59  
60

For peer review only

1  
2  
3  
4  
5  
6  
7  
8  
9  
10  
11  
12  
13  
14  
15  
16  
17  
18  
19  
20  
21  
22  
23  
24  
25  
26  
27  
28  
29  
30  
31  
32  
33  
34  
35  
36  
37  
38  
39  
40  
41  
42  
43  
44  
45  
46  
47  
48  
49  
50  
51  
52  
53  
54  
55  
56  
57  
58  
59  
60

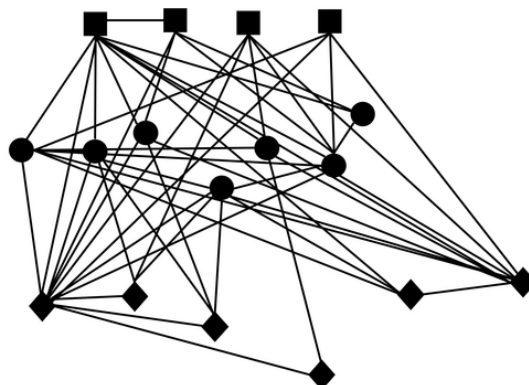

38x15mm (600 x 600 DPI)

1  
2  
3  
4  
5  
6  
7  
8  
9  
10  
11  
12  
13  
14  
15  
16  
17  
18  
19  
20  
21  
22  
23  
24  
25  
26  
27  
28  
29  
30  
31  
32  
33  
34  
35  
36  
37  
38  
39  
40  
41  
42  
43  
44  
45  
46  
47  
48  
49  
50  
51  
52  
53  
54  
55  
56  
57  
58  
59  
60



38x15mm (600 x 600 DPI)

1  
2  
3  
4  
5  
6  
7  
8  
9  
10  
11  
12  
13  
14  
15  
16  
17  
18  
19  
20  
21  
22  
23  
24  
25  
26  
27  
28  
29  
30  
31  
32  
33  
34  
35  
36  
37  
38  
39  
40  
41  
42  
43  
44  
45  
46  
47  
48  
49  
50  
51  
52  
53  
54  
55  
56  
57  
58  
59  
60

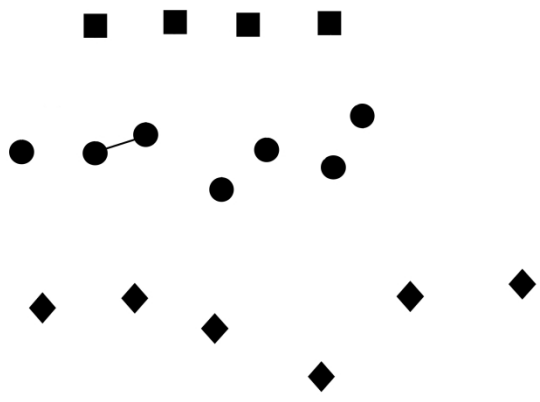

1  
2  
3 Survey questions: each question is presented with a list of all trainees in the team, with  
4 multiple selections permitted.  
5  
6  
7

8 Have you asked someone what to do in terms of something clinical, e.g. how to diagnose or  
9 treat a patient? If so, who?  
10

11 Have you ever approached a clinical problem a certain way because you had seen some one  
12 else do it a certain way? If so, who?  
13

14 If you had a question about a clinical problem, and everyone was available, are there people  
15 you would be likely to choose to ask?  
16  
17

18 Have you asked someone what to do in terms of something to do with providing good patient  
19 experience, If so, who?  
20

21 Have you ever approached an interaction with a patient patient experience problem a certain  
22 way because you had seen some one else do it a certain way, in order to provide good  
23 experience? If so, who?  
24  
25

26 If you wanted to know what to do in terms of an interaction with a patient, is there anybody  
27 you would seek out?  
28  
29

30 Have you asked a team member you should organise or prioritise a task, such as booking  
31 tests or doing paper work?  
32

33 Have you ever changed the way you organise or prioritise works tasks, for example, when in  
34 the day you do discharge documents, because you saw a colleague take a certain approach?  
35  
36  
37  
38  
39  
40  
41  
42  
43  
44  
45  
46  
47  
48  
49  
50  
51  
52  
53  
54  
55  
56  
57  
58  
59  
60

1  
2  
3 Box:

4  
5 Examples used to illustrate meaning of domains  
6  
7

8  
9 Clinical-technical: We mean information or ways of doing things to diagnose or treat disease.  
10 An example of influence in this domain would be when you are deciding whether to order a  
11 scan for pulmonary embolism, and might think of how a colleague has acted, or you might  
12 ask for advice.  
13  
14

15  
16 Patient centred: This refers to behaviours that affect patient experience, such as  
17 communication, reassurance, going 'the extra mile' to do something for a patient. An  
18 example might be a nurse asks you to speak to a patient who is anxious; it is not your patient  
19 and you are busy. Do you help? Perhaps you might be influenced by what you've seen others  
20 do, or perhaps you would ask advice?  
21  
22

23  
24 Self-organisation: The includes behaviours that impact on the efficiency, such as organising  
25 and prioritising your own work. An example would be ensuring all discharge documentation  
26 is done early in the day, to ensure that beds are freed. You might see someone else doing  
27 things a certain way, or might ask how others organise themselves.  
28  
29  
30  
31  
32  
33  
34  
35  
36  
37  
38  
39  
40  
41  
42  
43  
44  
45  
46  
47  
48  
49  
50  
51  
52  
53  
54  
55  
56  
57  
58  
59  
60

## Initial Interview guide

Sometimes, there are different ways of approaching a clinical problem, for example, should you do a scan, which choice of treatment should you use.

An example would be: Sometimes there is no evidence to support a decision; an example is, at what level of suspicion prompts investigation for pulmonary embolism. Some people are much more likely to order a scan in low risk cases. Others would avoid scanning when there is a very small likelihood of pulmonary embolism.

It might be that you take a certain approach because you've seen somebody else do it that way, or you might approach somebody from the team to ask advice; do you think that can happen?

Do you think there are some people you'd be more likely to copy, or ask?

Are there people who are particularly influential in this way?

Can you think about what it is about those people that makes you see them in that way?

Now thinking about ways you behave so as to produce good patient experience, an example behaviour would be: A nurse asks a doctor to review a patient in pain. The doctor is busy, and is not responsible for that patients. Some people will tell the nurse to call the relevant doctor. Some will take time to assess the patient and prescribe a pain killer.

Same questions

Now, thinking about ways you organise and prioritise the work you do away from patients. An example would be: Many people go through non patient facing tasks in an order that is easiest for them. You observe that one of your colleagues prioritises the tasks that will have the greatest benefit if done early, for example, preparing discharge documents so beds can be freed.

Same questions

Are there any other things you can think of about the way trainees in the team influence each other; and what makes someone especially influential?

## Standards for Reporting Qualitative Research (SRQR)

O'Brien B.C., Harris, I.B., Beckman, T.J., Reed, D.A., & Cook, D.A. (2014). Standards for reporting qualitative research: a synthesis of recommendations. *Academic Medicine*, 89(9), 1245-1251.

| No.                       | Topic                                                                                        | Item                                |
|---------------------------|----------------------------------------------------------------------------------------------|-------------------------------------|
| <b>Title and abstract</b> |                                                                                              |                                     |
| S1                        | Title                                                                                        | TITLE PAGE                          |
| S2                        | Abstract                                                                                     | PAGE 3                              |
| <b>Introduction</b>       |                                                                                              |                                     |
| S3                        | Problem formulation                                                                          | PAGE 4 LINES 11-53                  |
| S4                        | Purpose or research question                                                                 | PAGE 4 LINES 48-54                  |
| <b>Methods</b>            |                                                                                              |                                     |
| S5                        | Qualitative approach and research paradigm                                                   | PAGE 6 PAGES 34-51                  |
| S6                        | Researcher characteristics and reflexivity                                                   | PAGE 7 LINES 5-15                   |
| S7                        | Context                                                                                      | PAGE 5 LINES 20-26                  |
| S8                        | Sampling strategy                                                                            | PAGE 6 LINES 53-59                  |
| S9                        | Ethical issues pertaining to human subjects                                                  | PAGE 5 LINES 36-56                  |
| S10                       | Data collection methods                                                                      | PAGE 6 LINES 27-39 AND PAGE 9, 5-51 |
| S11                       | Data collection instruments and technologies                                                 | na                                  |
| S12                       | Units of study                                                                               | PAGE 6 LINES 8-19                   |
| S13                       | Data processing                                                                              | PAGE 7 LINES 44-51                  |
| S14                       | Data analysis                                                                                | ditto                               |
| S15                       | Techniques to enhance trustworthiness                                                        | PAGE 7 LINES 48-52                  |
| <b>Results/Findings</b>   |                                                                                              |                                     |
| S16                       | Synthesis and interpretation                                                                 | PAGE 8 LINE 11 and ff               |
| S17                       | Links to empirical data                                                                      | PAGE 9 LINE 12 and ff               |
| <b>Discussion</b>         |                                                                                              |                                     |
| S18                       | Integration with prior work, implications, transferability, and contribution(s) to the field | PAGE 14 LINE 27 and ff              |
| S19                       | Limitations                                                                                  | PAGE 16 LINE 29-43                  |



|                           |                            |
|---------------------------|----------------------------|
| <b>Other</b>              |                            |
| S20 Conflicts of interest | As per submission web page |
| S21 Funding               | As per submission web page |

<sup>a</sup>The rationale should briefly discuss the justification for choosing that theory, approach, method, or technique rather than other options available, the assumptions and limitations implicit in those choices, and how those choices influence study conclusions and transferability. As appropriate, the rationale for several items might be discussed together.

For peer review only

# BMJ Open

**The diffusion of knowledge and behaviours among trainee doctors in an acute medical unit and implications for quality improvement work. A mixed methods social network analysis.**

|                                 |                                                                                                                                                                                 |
|---------------------------------|---------------------------------------------------------------------------------------------------------------------------------------------------------------------------------|
| Journal:                        | <i>BMJ Open</i>                                                                                                                                                                 |
| Manuscript ID                   | bmjopen-2018-027039.R2                                                                                                                                                          |
| Article Type:                   | Original research                                                                                                                                                               |
| Date Submitted by the Author:   | 24-Sep-2019                                                                                                                                                                     |
| Complete List of Authors:       | Sullivan, Paul; Imperial College, CLAHRC<br>Saatchi, Ghazal; Danone UK<br>Younis, Izaba; Imperial College, CLAHRC<br>Harris, Mary; Chelsea and Westminster Healthcare NHS Trust |
| <b>Primary Subject Heading</b>: | Health services research                                                                                                                                                        |
| Secondary Subject Heading:      | Emergency medicine                                                                                                                                                              |
| Keywords:                       | INTERNAL MEDICINE, Change management < HEALTH SERVICES ADMINISTRATION & MANAGEMENT, MEDICAL EDUCATION & TRAINING                                                                |
|                                 |                                                                                                                                                                                 |

SCHOLARONE™  
Manuscripts

1  
2  
3  
4  
5  
6  
7 **Title Page**  
8

9 Title: The diffusion of knowledge and behaviours among trainee doctors in an acute medical unit  
10 and implications for quality improvement work. A mixed methods social network analysis.  
11

12 Corresponding Author: Dr Paul Sullivan  
13

14 CLAHRC for NW London  
15 Department of Primary Care and Public Health  
16 Imperial College London  
17 Chelsea and Westminster Hospital  
18 369 Fulham Rd\London SW10 9NH  
19

20 [p.sullivan@imperial.ac.uk](mailto:p.sullivan@imperial.ac.uk)  
21

22 0203 315 8144  
23

24 **Authors:**  
25

26 Paul Sullivan, Department of Primary Care and Public Health  
27 Imperial College London  
28 Chelsea and Westminster Hospital  
29 369 Fulham Rd  
30 London SW10 9NH  
31 UK  
32

33 Ghazal Saatchi  
34 Danone Ltd  
35 London, UK  
36

37 Izaba Younis  
38 Imperial College London  
39 Chelsea and Westminster Hospital  
40 369 Fulham Rd  
41 London SW10 9NH  
42 UKis  
43

44 Mary Harris,  
45 Chelsea and Westminster NHS Foundation Trust,  
46 London  
47

48  
49 **Keywords**

50 Internal Medicine; Change Management, Medical Education and Training.  
51  
52  
53

54 **Wordcount: 3930**  
55  
56  
57  
58  
59  
60

1  
2  
3  
4  
5  
6  
7  
8 **Abstract:**

9  
10 Abstract

11  
12  
13 **Objectives:** To describe the social networks that diffuse knowledge, attitudes and  
14 behaviours relating to different domains of practice within teams of trainee doctors in an  
15 acute hospital medical setting. The domains examined were “clinical-technical”, “patient  
16 centeredness” and “organisation of work”.

17  
18  
19  
20  
21  
22 **Design:** Sequential mixed methods: i) sociocentric survey of trainee consisting of questions  
23 about which colleagues are emulated or looked to for advice, with construction of social  
24 network maps, followed by ii) semi structured interviews regarding peer to peer influence,  
25 analysed using a grounded theory approach. The study took place over 24 months.

26  
27  
28  
29  
30  
31 **Setting:** An acute medical admissions unit, which receives admissions from the emergency  
32 department and primary care, in a NHS England teaching hospital.

33  
34  
35  
36 **Participants:** Trainee medical doctors working in five consecutive rotational teams. Surveys  
37 were done by 39 trainee doctors; then 20 different participants from a maximal diversity  
38 sample were interviewed.

39  
40  
41  
42  
43 **Results:**

44 Clinical-technical behaviours spread in a dense network with rich horizontal peer to peer  
45 connections. Patient centred behaviours spread in a sparse network. Approaches to non-  
46 patient facing work are seldom copied from colleagues. Highly influential individuals for  
47 clinical technical memes were identified; high influencers were not identified for the other  
48 domains.

49  
50  
51  
52  
53  
54  
55 **Conclusion:** Information and influence relating to different aspects of practice have different  
56 patterns of spread within teams of trainee doctors; highly influential individuals were  
57 important only for spread of clinical-technical practice. Influencers have particular  
58 characteristics, and this knowledge could guide leaders and teachers.

## Article summary

### Strengths

This is the first research describing several coexisting social networks in the same team in medical practice.

Interviews were used to explore and explain phenomena underlying the social network patterns.

### Limitations

The surveys and interviews could be subject to recall bias, which is a recognised issue in social network research.

Respondents may be subject to influence and learning that they are not conscious of, and so an 'invisible' social network may have been overlooked.

We researched social networks within bounded teams of trainee doctors; links to other doctors outside the core team and links to other disciplines are not included.

## Introduction

Doctors in training are important members of the clinical microsystems that deliver acute medical care.[1] The quality of that care is affected by the knowledge, attitudes and behaviours that they bring to bear. Despite long undergraduate and postgraduate training, many elements of real-world care can be under-represented in the formal curriculum, including broader patient centred behaviours, such as expressing compassion, shared decision making and providing good experience, and practical skills such as managing oneself and one's work. [2,3] Once qualified, trainee doctors form communities of practice and continue to acquire skills and knowledge through 'on the job' contextual learning.[4,5,6 ] Learning from peers is an important and valued part of this experience. A national multispecialty survey of trainee doctors rated learning from other trainees as contributing more to their learning than lectures, tutorials and reading.[7] Knowledge of the patterns of peer-peer connections that channel such spread would enable quality improvement leaders and teachers to optimise uptake of new practice across clinical teams.[8]

The aim of this research is to explore how knowledge, attitudes and behaviours diffuse between individuals through different network structures within bounded teams of trainee doctors. Different types of skills and behaviours impact the quality of medical care. Clinical-technical knowledge and skills help trainees reach correct diagnoses, and deliver correct treatments (an example would be knowing which patients should undergo a certain diagnostic test). Patient-centredness skills increase the quality of patient and carer experience (an example would be the ability to reassure an anxious patient). We postulated a third category, that we termed 'organisation of work', by which we refer to the skills that allow clinicians to prioritise and order tasks, particularly non-patient facing tasks, so as to reduce the cost of care (an example would be the ability to prioritise tasks that impact resource use) (supplementary file 1). We hypothesised that memes, (using the original meaning: A unit of knowledge, attitude or behaviour that can spread between individuals through communication or imitation) relating to these different aspects of day to day work may be conducted via different channels within the same clinical team.[9] If this is the case, it may be necessary to use different approaches to disseminate memes associated with the different domains and this knowledge would serve as a guide to clinical leaders and quality improvement agents who aim to change practice across diffuse clinical teams.

1  
2  
3  
4  
5 We conducted the research among several different teams of trainee doctors a single acute  
6 medical unit (AMU). The AMU provides care for the initial 24-72 hours of an emergency  
7 medical hospital admission.[10,11] AMU trainees have access to a relatively large team of  
8 colleagues who they can approach for advice, or who's work they can observe. We  
9  
10 constrained the research to interactions that occur in real time during work and did not  
11 explore use of electronic media. The study used a mixed methods sequential design, with  
12 surveys mapping network structures, followed by interviews with members from later teams  
13 that added to and triangulated the survey data and explored survey findings.  
14  
15  
16  
17  
18  
19

## 20 **Ethical Issues**

21  
22  
23 Ethical approval for this study was obtained from Hampshire-B REC; reference 15/SC/0052.  
24 All participants gave informed consent.  
25  
26  
27

28 One researcher (PS) was a consultant who spent some time working in the unit. We believe  
29 that the relationship between PS and the trainees was not such that participants would feel  
30 coerced. All trainees invited took part, we believe this is because we ensured participation  
31 was convenient.  
32  
33  
34

35  
36  
37 The surveys asked people to name colleagues who were influential for them. We reassured  
38 participants that confidentiality would be maintained and survey data would in anonymized  
39 format.  
40  
41  
42  
43

## 44 **Methods**

### 45 Participants

46  
47  
48 Participants were doctors in training working in a single acute admission unit in an NHS  
49 hospital. Teams of doctors are allocated to the unit, at four to six monthly intervals. They are  
50 training in internal medicine, but they have different experiences and skills that they bring  
51 from previous roles. The research was conducted in five consecutive teams, each of  
52 approximately 20 trainee doctors, over a total period of 24 months. The first two teams  
53  
54  
55  
56  
57  
58  
59  
60

1  
2  
3 completed electronic surveys, and the members of the following four teams participated in  
4 interviews.  
5  
6  
7  
8  
9

### 10 Surveys

11  
12  
13 We invited all trainees in two consecutive AMU teams to complete an electronic survey  
14 (Qualtrics, Provo, UT). The sociometric survey (supplementary file 2) included questions  
15 about who they had asked for advice, who they would choose to approach in future, and who  
16 have they emulated or been influenced by in the AMU team. The questions were repeated for  
17 each of the three domains. Teams completed 19 and 20 surveys respectively. Survey  
18 responses were converted to unweighted directional edges and entered into SocNetV software  
19 to construct network graphs for each of the two teams, one graph for each work domain.  
20  
21  
22  
23  
24  
25  
26

27 Method of approach: Participants were invited at the end of routine team meetings to take  
28 part by accessing the survey on their electronic devices.  
29  
30  
31  
32  
33

### 34 Interviews

35  
36  
37 Participants were selected as a maximum diversity sample, to include representatives at  
38 different stages of training to avoid bias. Subjects were approached on a 1:1 basis in the  
39 workplace invited to do an interview at a time convenient to them. All those invited agreed to  
40 take part.  
41  
42  
43  
44  
45  
46  
47

48 Two researchers conducted interviews. GS, research fellow, (female) had no prior contact  
49 with the teams; PS (male) was a consultant physician and had had some intermittent working  
50 contact with the participants. Both had previous experience of qualitative research at  
51 postgraduate level. Coders agreed that there were no apparent differences between the  
52 findings from the interviews of the two researchers. PS as interviewer had preconception that  
53 highly influential individuals would be those with less patient centered attitudes.  
54 These preconceptions relate to PS's own training in the 1980s. Results were very different  
55  
56  
57  
58  
59  
60



1  
2  
3 from these views, and we believe that these preconceptions did not cause bias. GS is a non  
4 clinical researcher and had no previous knowledge of acute medical practice.  
5  
6  
7  
8  
9

10 Interviews were semi structured, and included vignettes to illustrate the meaning of the  
11 domains. Interview guides included questions about which colleagues were particularly  
12 influential, and what their characteristics were, in order to explore the finding of the presence  
13 of high influencers from the initial survey phase of the study. Interview guides are included  
14 as supplementary file 3.  
15  
16  
17  
18  
19

20 We were not aware of any existing literature on knowledge transfer and influence  
21 specifically related to different aspects of practice. We used the domains as a framework to  
22 guide interviews, but used an inductive-deductive grounded theory approach to develop novel  
23 theories about the ways that diffusion happened and the way that influencers were identified.  
24 Developing theories were fed back in subsequent interviews for triangulation.[12]  
25  
26  
27  
28  
29

30 Theoretical analysis was done independently by two coders using NVivo V11.4.1 (QSR  
31 International Pty Ltd). Coding was done after every 2-4 interviews. Themes that developed  
32 were incorporated as prompts into subsequent interviews. When items were coded differently  
33 the coders discussed these and reached consensus. Interviews continued until it appeared that  
34 theoretical saturation was achieved. Initial interview guides are appended.  
35  
36  
37  
38  
39  
40  
41  
42  
43

#### Patient and public involvement

44  
45  
46 None.  
47  
48

#### **Results:**

##### Surveys

49  
50  
51  
52  
53  
54  
55 We found that clinical-technical knowledge flowed through dense networks with rich  
56 horizontal connections, (see figures 1-3). In contrast, the network conducting memes relating  
57 to patient-centeredness was sparse, and where there was person to person transmission, it  
58  
59  
60

1  
2  
3 tended to be among isolated pairs with no chains. Ways of organizing work were apparently  
4 hardly influenced at all by others. For the clinical technical domain, the average number of  
5 people each individual influenced (average degree) was 3.7 and 3.5 for team 1 and team 2,  
6 and the number of connections as a proportion of the maximum possible (density) was 0.3  
7 and 0.2. Equivalent values for the patient centred domain were lower, 0.4 and 0.6 for average  
8 degree and 0.03 and 0.02 for density. Values for the communication of memes relating to  
9 organisation of work were 0.05 and 0.00 for average degree and 0.003 and 0.00 for density.  
10 Figures 1-3 show the network graphs for the three domains for team one; the graphs for  
11 team two showed similar topography. Some individuals showed network features of with  
12 high influencers. These were high degree centrality (the number of connections that an  
13 individual has) and betweenness centrality (the number of bridges an individual completes  
14 between others) which is associated with the ability to control information flow.[13]  
15  
16  
17  
18  
19  
20  
21  
22  
23  
24  
25  
26  
27  
28  
29  
30

### 31 Interviews

32  
33  
34 We conducted 15 interviews and consider that theoretical saturation was achieved.  
35  
36 Participants were representative of the mix of levels of seniority within the team of trainees: 5  
37 Foundation year (house officer, US intern equivalent), 7 core or specialty trainees in year 1-3  
38 (senior house officer, US resident equivalent), 3 core or specialty trainees 4-7 (registrar,  
39 resident or fellow equivalent); 9 were female, all had trained in UK medical schools.  
40  
41  
42  
43  
44

45 Theories that emerged were i) there were characteristics of actions that determined if they  
46 would be taken on board by a trainee, and ii) there were characteristics of people that  
47 determined if their advice would be used or actions emulated; iii) some values and beliefs  
48 that influenced behaviour came from outside of work; iv) patterns of influencing differed  
49 between domains.  
50  
51  
52  
53  
54  
55

56 There was consensus among trainees that a significant proportion of their work practice was  
57 based on learning from peers.  
58  
59  
60

1  
2  
3 *“You learn a lot of theory in med school but actually when you get here things are done*  
4 *differently and you learn by seeing what people more senior or experienced do.” FY1*  
5  
6  
7

8 Domain 1: Technical-clinical; Diagnosing and treating.  
9

10  
11 Characteristics of influencers  
12

13  
14 Chief determinants of individuals who were technical influencers were approachability and  
15 kindness, a record of visible successes and conscientiousness.  
16  
17

18  
19 Approachability was based not only on the way an individual had responded in the past to  
20 requests for help and advice, but also on how kind they were in general - to patients and to  
21 members of other disciplines; trainees predicted that people who were globally kind would be  
22 kind to them if they sought advice.  
23  
24

25  
26 *“my feeling is their empathy toward patients will be similar to their empathy toward me”*  
27  
28

29  
30 *“There’s definitely people who won’t give you a hard time. You can see how they are toward*  
31 *other people, nurse, patents.” CT1*  
32  
33

34  
35 Many participants expressed that they valued kindness toward patients for its own sake, and  
36 held kind colleagues in higher esteem, and were more likely to trust and copy their technical  
37 practices.  
38

39  
40 *“I think, to be honest, the number one thing is kindness.”(referring to judging global*  
41 *competence) CT1*  
42  
43

44  
45 *“Someone who’s kind to patients and kind to everyone on the ward ..... that’s the kind of*  
46 *person I would copy in other ways.” CT2*  
47  
48

49  
50  
51  
52  
53  
54  
55  
56 Conversely,  
57  
58  
59  
60

1  
2  
3 “even if they’re, say, a brilliant diagnostician or surgeon, if I see someone behaving badly  
4 with a patient, I struggle to learn from them”  
5  
6  
7  
8  
9

10 Trainees valued friendship and friendliness

11  
12  
13 “if they’re pally, if you’ve chatted to them before, consider them friends, you’re likely to  
14 trust their knowledge and skills”  
15  
16

17  
18  
19 “I’m much more likely to copy the good bits in the people I’m already on good terms with  
20 who might be my friend”  
21  
22

23  
24  
25  
26  
27 Individuals who were seen as committed to doing their job well were influencers.

28  
29  
30 “Some work hard at being good at their job, you’ll walk in on them, like, reading things on  
31 line and things, that kind of person I would be more inclined to copy.” CT2  
32  
33

34  
35  
36 “There are certain doctors, I like the way they go about the profession, I feel I could learn a  
37 lot by acting like them.” CT1  
38  
39

40  
41 Characteristics of actions and behaviours themselves could make them more likely to be  
42 emulated  
43  
44

45  
46 A great deal of weight was placed on observable success. This might be an unlikely disease  
47 picked up by a test, or a treatment when a patient is seen to recover. Strategies such as  
48 diagnostic work up were valued when “thorough”, meaning that several possible diagnoses  
49 were considered and excluded. When a colleague explained the logic behind a clinical  
50 approach, the trainees were more likely to incorporate it.  
51  
52  
53  
54

55  
56 Domain 2: Providing good patient experience.  
57  
58  
59  
60

1  
2  
3 All trainees expressed that they had never, and did not envisage that they would in future, ask  
4 for advice on interpersonal interaction with a patient. There was a feeling that this was a  
5 behaviour that should be determined by one's own values that largely came from outside the  
6 profession and often pre-dated medical school.  
7  
8  
9

10  
11  
12 *"I think you come with ideas of how you'd like to be, how you'd like to speak to people"*  
13

14  
15 *"you're taught a lot of science but you sort of come before that with an idea of how you want*  
16 *provide people with dignity and being honest and open, that's the values I've had, it's been*  
17 *long term "*  
18  
19

20  
21  
22 *"I had that sort of preconceived idea from before I even came to medical school"*  
23  
24

25 As a source of these values, parental influence was mentioned most often; trainees felt they  
26 carried the beliefs and behaviors that their parents displayed. Other cited sources were  
27 secondary school, social groups, exposure to life in general and, in only one case, religion.  
28  
29  
30

31  
32  
33 *"Probably from parents, encouraging good values, I was just always told that's the way to do*  
34 *it and eventually it becomes part of who you are"*  
35  
36  
37  
38

### 39 Characteristics of actions and behaviours

40  
41  
42

43 When questioned about the ways that they could be influenced at work to behave differently  
44 toward patients, all trainees talked about communication skills and learning through  
45 observing ways that conversations were phrased. Trainees wanted to improve skills in 'set  
46 piece' situations, such as end-of-life discussion. They copied snippets, to use in the future.  
47  
48  
49  
50

51 We explored what they meant by good communication that they would emulate. A  
52 commonly cited criterion was a successful outcome. Examples of success included the  
53 patient appearing to understand what they were being told, evidenced by verbal or non-verbal  
54 signals. A number cited as an example of success a patient being convinced to change their  
55 mind and accept a treatment that the doctor felt they should receive.  
56  
57  
58  
59  
60

1  
2  
3 In contrast to the clinical domain, personal characteristics of the person who was being  
4 observed was not perceived to impact on whether they would be influential.  
5  
6  
7

8 *“If I can see there’s progress being made, personality is neither here or there, if goal has*  
9 *been achieved.” FY2*  
10  
11

12  
13 Going beyond learning about phrasing, we explored the influencing of wider values and  
14 attitudes  
15  
16

## 17 18 CHARACTERISTICS OF PEOPLE 19

20  
21  
22 Many participants tended to select role models who had similar values, with the role model  
23 used to reinforce existing beliefs/behaviors.  
24  
25

26  
27 *“I guess I come to it with a kind and caring nature and one of the important things I look*  
28 *for in a role model is, do they have that too?”*  
29  
30

31  
32 *“there is a subconscious... why did I get into this and who do I deem also to be in for the*  
33 *right reasons, actually to help people and look after patients”*  
34  
35

36  
37 *“I guess, me, personally I've always been an all rounder, I see it's important I have respect*  
38 *for an all rounder like me, that's who I will look to; being kind is part of being an all*  
39 *rounder”*  
40  
41  
42

43  
44 Trainees particularly noticed small discretionary acts, cited examples included making tea  
45 for a patient, responding to a patient who is calling out for attention, and making a special  
46 effort to contact a patient’s relatives. Several felt that they had behaved differently after  
47 seeing somebody else put themselves out to provide good patient experience.  
48  
49  
50

51  
52  
53 *“If I see Dr X make someone a cup of tea I think I SHOULD try to be more like that, I*  
54 *SHOULD try to be better”*  
55  
56

57  
58 Some trainees discussed the way that observing negative patient centered behaviors could  
59 affect them, and felt their behavior was adversely affected when the majority of a team were  
60

1  
2  
3 behaving in a non-patient-centred way. However, they felt that they were more strongly  
4 influenced by seeing what they felt was good patient centered care, than bad. When local  
5 culture was contrary to good care, they could be inspired for the good by a single individual.  
6  
7  
8  
9

10 *“If someone said “hang on a minute let’s think about what more we can do for the patient”, I*  
11 *think definitely I’d stop and take a moment and think ‘is there more we can do’” FYI*  
12  
13  
14  
15  
16  
17  
18

### 19 Domain 3: organization of work

20  
21  
22 Trainees generally agreed that there were no personal characteristics that made an individual  
23 influential in terms of ways of organizing work.  
24  
25  
26

27 There was a sense of willingness to do work differently if asked to do so but only by people  
28 who worked in the same clinical context and knew about how things worked. There was  
29 resistance to adapting practice in response to requests from people seen as outsiders,  
30 particularly managers.  
31  
32  
33  
34  
35

36 *...if it’s someone doing a similar job to you, I’d be inclined to try it, but if it was someone not*  
37 *from this environment, someone in a suit, someone who doesn’t do a job like this, my*  
38 *reaction to that would be “actually you don’t understand how busy this job is”. FY2*  
39  
40  
41  
42

43 *If a senior ward nurse asked me to do something this way, because it helped them, I’d be*  
44 *more likely,*  
45  
46  
47

48 There was a strong sense that an approach would have to be tested personally before  
49 adoption.  
50  
51  
52

53 *If someone did something, and it seemed to work, I’d try it to see if it worked, it wouldn’t*  
54 *matter whether I looked up to that person or not*  
55  
56  
57  
58  
59  
60

1  
2  
3 There was a widespread feeling that trainees could not make a difference to care by the way  
4 they organized their work because the system is so inflexible it tends to negate benefits of  
5 improving working practices, and so it is not worth trying to improve one's efficiency.  
6  
7  
8  
9  
10

#### 11 Discussion:

12 Behaviours and information flow from individual to individual. This leads to dissemination  
13 of knowledge and influence across groups through patterns of habitual connections that are  
14 termed social networks. This phenomenon has been described in a broad range of social  
15 contexts, including clinical teams.[14-16] Social network analysis explores the way that  
16 individuals interact with social context, and how structures emerge from interpersonal  
17 interactions, increasing our understanding of behaviours. Previous research has shown that  
18 social networks are key for developing practice among trainee doctors.[17,18,19] Knowledge  
19 about the function of networks among trainees offers important intelligence for those who  
20 aim to improve the quality of care within frontline clinical microsystems through training and  
21 influence. Most existing studies of health professionals have mapped generic social  
22 networks, without differentiating or identifying the type of information conducted.[20] In the  
23 teams of medical trainees that we investigated, we found that there were multiple  
24 synchronous network structures channeling memes relating to different domains of practice.  
25 This is the first study to our knowledge that has mapped coexisting networks that conduct  
26 different kinds of information within a single clinical team.  
27  
28  
29  
30  
31  
32  
33  
34  
35  
36  
37  
38  
39  
40

41 We found that learning and influence in the different domains studied flowed very  
42 differently, if at all. Clinical-technical knowledge flowed through densely connected  
43 networks. In contrast, the team networks relating patient centeredness were present but were  
44 sparse, and there were suggestion from interviews that there were important influences that  
45 the team and the profession. "Orgnaisation of work" appeared not to have any direct peer to  
46 peer spread. This suggests different strategies might be needed to introduce memes relating  
47 to different domains. New clinical technical knowledge is the the most likely to diffuse  
48 passively within a team. Patient centred behaviours have a limited degree of peer to peer  
49 transfer, and so enthusiasts might best role model these behaviours frequently, to multiple  
50 members of a team. Organizing work appears to be devoid of any spread or emulation, and  
51 human factor approaches might be more successful than role modelling.  
52  
53  
54  
55  
56  
57  
58  
59  
60



1  
2  
3 Interviews provided triangulation for the survey finding of the existence of a few high  
4 clinical-technical influencers. Attributes of clinical-technical influencers included consistent  
5 kindness, and signs of conscientiousness. An interesting finding was that trainees appraised  
6 clinical management on the basis of visible diagnostic or therapeutic success. This is at odds  
7 with the fact that many diagnostic strategies deliberately aim for low yields, and many  
8 treatments have a high 'number needed to treat' or delayed outcomes: Therefore many  
9 correct management approaches have visible success only on rare occasions. This makes  
10 explanation of underlying logic important in teaching.  
11  
12  
13  
14  
15  
16  
17

18 In relation to the spread of patient centeredness, trainees did not identify highly influential  
19 individuals, and it was actions themselves were seen as more or less worthy of emulation.  
20 Compassion, a concern for the impact of behaviors on the patients' internal psychological  
21 state was not volunteered as a driver. Instead, communication interactions were judged on the  
22 basis of 'getting the job done', for example, getting a message over accurately or getting the  
23 patient to agree with the doctor on a decision. The failure to talk about concern for the  
24 patient's emotions may be an artefact of the kind of language used day to day, and may not  
25 reflect an absence of compassion. However, the findings point to a need for leaders to be  
26 explicit about behaving to improve patient experience and to demonstrate and teach  
27 approaches such as shared decision making. An interesting finding was that trainees  
28 described that they looked to people they felt to be similar to themselves as their role  
29 models. Doctors felt they carried their own values from outside their professional life, and  
30 looked for validation, rather than looking to adopt new sets of values. If true, this has  
31 implications for those hoping to inculcate values among trainees, suggesting that amplification  
32 of existing mores may be more appropriate.  
33  
34  
35  
36  
37  
38  
39  
40  
41  
42  
43  
44  
45

46 Many of these findings are in keeping with existing literature. The presence of high  
47 influencers in healthcare teams is established. In keeping with our own results, the  
48 personality characteristics associated with this network influencing roles have been shown to  
49 include conscientiousness and agreeableness.[21] The importance of perception of the utility of  
50 a practice, which we found to be key for adoption of ways of organizing work, is also  
51 described elsewhere.[22]  
52  
53  
54  
55  
56  
57

58 We have added an extra dimension to existing knowledge of healthcare professional  
59 networks by differentiating and describing social networks that spread different kinds of  
60

1  
2  
3 work related information and influence in medical teams. This can inform teaching and  
4 communication strategies according to the domain of practice being targeted. Our findings  
5 also provide insight into how an individual might adapt their own behavior so as to exert  
6 more influence.  
7  
8  
9

10  
11 This work has a number of limitations. It was conducted in a single center, and may not be  
12 representative of all acute settings, although in mitigation, six different consecutive clinical  
13 teams were included over a period of 2 years. We limited the research to trainee doctors, and  
14 did not include other professions; previous work has described the importance of networks  
15 that span professional groups; it would be interesting to go on to perform more inclusive  
16 studies. Future research could explore how individuals from outside of the core team and  
17 from different disciplines exert influence, and how electronic media provides wider peer to  
18 peer links. The categorization of memes into three domains is pragmatic and certainly over  
19 simplistic, and there are many more subtle aspects of practice that could be explored in  
20 future work.  
21  
22  
23  
24  
25  
26  
27  
28  
29

30  
31 Conclusion: The social networks of influence and knowledge transfer among trainee doctors  
32 in an acute setting conform to quite different patterns when considering the spread of  
33 innovations in three domains, technical clinical, patient centered and organization of work.  
34 The characteristics and prevalence of highly influential individuals also differs between  
35 domains. This casts light on the way that practices develop across a team, informs those  
36 who wish to enhance their influencing, and emphasizes the importance of making desirable  
37 behaviors clearly visible to facilitate their spread. Knowing how these coexisting networks  
38 are configured and driven is likely to be useful for those leading quality improvement work  
39 that requires on the uptake of innovative behaviors across a clinical microsystem.  
40  
41  
42  
43  
44  
45  
46  
47  
48  
49

50 This article presents independent research supported by the National Institute for Health  
51 Research (NIHR) under the Collaboration for Leadership in Applied Health Research and  
52 Care (CLAHRC) programme for Northwest London. The views expressed in this publication  
53 are those of the author(s) and not necessarily those of the NHS, the NIHR or the Department  
54 of Health and Social Care.  
55  
56  
57

58 **Contributor ship statement:** PS conceived the study; PS and GS collected data; PS, GS,  
59 MH and IY all contributed to analysis and writing.  
60

1  
2  
3  
4  
5 **Competing interests:** no competing interests  
6  
7

8 **Funding:** PS is funded by Chelsea and Westminster NHS Foundation Trust and NIHR  
9 CLAHRC NW London; GS is funded by Danone Ltd; IY is funded by The Health  
10 Foundation, UK  
11  
12  
13  
14

15 **Data sharing statement:** Data is not publicly available because a condition consent was that  
16 all interview and survey data would be destroyed after analysis.  
17  
18  
19

20  
21  
22 **Figure Legends:**  
23  
24

25  
26 Figure 1: Network graph showing directed connections that conduct clinical-technical  
27 knowledge and influence. Square = CT4-7 grades (registrar), Circles = CT 1-3 (SHO),  
28 Diamonds = FY 1-2 (house officer).  
29  
30

31  
32 Figure 2: Graph for network relating to the patient centred behaviours.  
33  
34

35  
36 Figure 3: Graph for network relating to the non patient-facing practices.  
37  
38  
39  
40  
41  
42  
43  
44  
45  
46  
47  
48  
49

50 **References**

- 51 1. Nelson EC, Godfrey MM, Batalden PB, Berry SA, Bothe AE, McKinley KE, et al.  
52 Clinical microsystems, part 1. The building blocks of health systems. Jt Comm J  
53 Qual Patient Saf Jt Comm Resour. 2008;34:367–78.  
54  
55  
56  
57  
58  
59  
60

- 1  
2  
3 2. Fernandez A, Teherani A, Boscardin CK, Saba GW. Assessment of medical  
4 students' shared decision-making in standardized patient encounters.  
5 J Gen Intern Med. 2011;26:367-72  
6  
7
- 8  
9 3. Burack JH, Irby DM, Carline JD, Root RK, Larson EB. Teaching compassion  
10 and respect; attending physicians' responses to problematic behaviors. J Gen Intern  
11 Med. 1999; 14:49-55  
12  
13
- 14  
15 4. Swanwick T. Informal learning in postgraduate medical education: from  
16 cognitivism to 'culturism'. Medical Education. 2005; 39:859-865  
17  
18
- 19  
20 5. Lingard L, McDougall A, Levstik M, Chandok M, Spafford MM,  
21 Schryer. Representing complexity well: a story about teamwork, with  
22 implications for how we teach collaboration. Medical Education 2012; 46: 869–  
23 877  
24  
25  
26  
27  
28  
29
- 30 6. Wenger, E. Communities of Practice: learning, meaning and identity. 1998  
31 Cambridge, Cambridge University Press  
32  
33  
34  
35  
36  
37
- 38 7 DeWitt C. Baldwin DC, Daugherty SR. How Residents Say They Learn: A National,  
39 Multi-Specialty Survey of First- and Second-Year Residents. J Grad Med Educ. 2016;  
40 8: 631–639.  
41  
42  
43  
44
- 45 8 Meltzer D , Chung J, Khalili P, Marlowa E, Arora V , Schumock G, Burt R. Exploring  
46 the use of social network methods in designing healthcare quality improvement  
47 teams. Soci(al Science & Medicine. 2010; 71: 1119-1130  
48  
49  
50  
51
- 52 9 Distin, K. 2004. The Selfish Meme: A Critical Reassessment. Cambridge: Cambridge  
53 University Press. doi:10.1017/CBO9780511614286  
54  
55  
56  
57
- 58 10 Acute Medicine Taskforce. Acute medical care. 2007.  
59 [https://www.rcplondon.ac.uk/sites/default/files/documents/acute\\_medical\\_care\\_fi](https://www.rcplondon.ac.uk/sites/default/files/documents/acute_medical_care_fi)  
60

1  
2  
3 [nal\\_for\\_web.pdf](#) (Accessed 7.4.19)  
4  
5  
6

- 7 11 Bell D, Skene H, Jones M, Vaughan L. A guide to the acute medical unit. *Br J Hosp*  
8 *Med.* 2008; 69:M107-9.  
9  
10  
11  
12 12 Heath H, Cowley S. Developing a grounded theory approach: a comparison of Glaser  
13 and Strauss. *Int J Nurs Stud.* 2004;41:141–50.  
14  
15  
16  
17 13 Battistoni E, Fronzetti Colladon A. Personality correlates of key roles in informal  
18 advice networks. *Learn Individ Differ.* 2014;34:63–9.  
19  
20  
21  
22  
23  
24  
25 14 Christakis N, Fowler JH. Social contagion theory: examining dynamic social networks  
26 and human behavior. *Stat Med.* 2013 Feb;32:556–77.  
27  
28  
29  
30  
31 15 Rogers E. *Diffusion of Innovations.* New York: Free Press; 1983.  
32  
33  
34 16 Wagter JM, van de Bunt G, Honing M, Eckenhausen M, Scherpbier A. Informal  
35 interprofessional learning: Visualizing the clinical workplace. *J Interprof Care.*  
36 2012;26:173–82.  
37  
38  
39  
40  
41  
42 17 Isba R, mWoolf K, Hanneman R. Social network analysis in medical education.  
43 *Medical Education* 2017: 51: 81–88  
44  
45 18 Shokoohi M, Nedjat S, Majdzadeh R. A social network analysis on clinical education  
46 of diabetic foot. *J Diabetes Metab Disord.* 2013;12:44–44.  
47  
48  
49  
50  
51 19 Jippes E, Achterkamp MC, Brand PLP, Kiewiet DJ, Pols J, van Engelen JML, et al.  
52 Disseminating educational innovations in health care practice: training versus social  
53 networks. *Soc Sci Med.* 2010;70:1509–17.  
54  
55  
56  
57  
58 20 Chambers D, Wilson P, Thompson C, Harden M. Social network analysis in healthcare  
59 settings: A systematic scoping review. *PLoS ONE.* 2012 [cited 2018 Apr 7];7. Available  
60

1  
2  
3 from:<http://journals.plos.org/plosone/article?id=10.1371/journal.pone.0041911>  
4  
5 (Accessed 10.4.19)  
6  
7

- 8  
9 21 Fong A, Clark L, Cheng T, Franklin E, Fernandez N, Ratwani R, et al. Identifying  
10 influential individuals on intensive care units: using cluster analysis to explore  
11 culture. *J Nurs Manag.* 2017;25:384–91.  
12  
13  
14  
15  
16 22 Murray E, Treweek S, Pope C, Macfarlane A, Finch T, C. O, et al. Normalisation  
17 process theory: A framework for developing, evaluating and implementing complex  
18 interventions. *BMC Med.* 2010;8:2–11.  
19  
20  
21  
22  
23  
24  
25  
26  
27  
28  
29  
30  
31  
32  
33  
34  
35  
36  
37  
38  
39  
40  
41  
42  
43  
44  
45  
46  
47  
48  
49  
50  
51  
52  
53  
54  
55  
56  
57  
58  
59  
60

1  
2  
3  
4  
5  
6  
7  
8  
9  
10  
11  
12  
13  
14  
15  
16  
17  
18  
19  
20  
21  
22  
23  
24  
25  
26  
27  
28  
29  
30  
31  
32  
33  
34  
35  
36  
37  
38  
39  
40  
41  
42  
43  
44  
45  
46  
47  
48  
49  
50  
51  
52  
53  
54  
55  
56  
57  
58  
59  
60

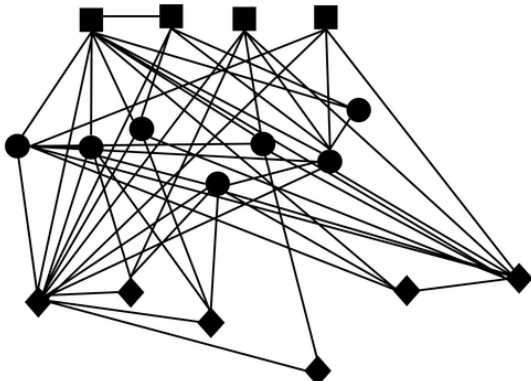

38x15mm (600 x 600 DPI)

1  
2  
3  
4  
5  
6  
7  
8  
9  
10  
11  
12  
13  
14  
15  
16  
17  
18  
19  
20  
21  
22  
23  
24  
25  
26  
27  
28  
29  
30  
31  
32  
33  
34  
35  
36  
37  
38  
39  
40  
41  
42  
43  
44  
45  
46  
47  
48  
49  
50  
51  
52  
53  
54  
55  
56  
57  
58  
59  
60

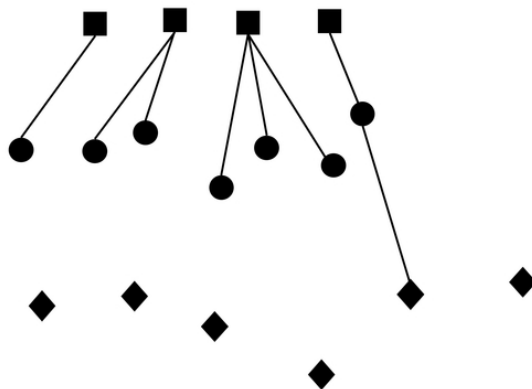

38x15mm (600 x 600 DPI)



1  
2  
3  
4  
5  
6  
7  
8  
9  
10  
11  
12  
13  
14  
15  
16  
17  
18  
19  
20  
21  
22  
23  
24  
25  
26  
27  
28  
29  
30  
31  
32  
33  
34  
35  
36  
37  
38  
39  
40  
41  
42  
43  
44  
45  
46  
47  
48  
49  
50  
51  
52  
53  
54  
55  
56  
57  
58  
59  
60



1  
2  
3 Box:

4  
5 Examples used to illustrate meaning of domains  
6  
7

8  
9 Clinical-technical: We mean information or ways of doing things to diagnose or treat disease.  
10 An example of influence in this domain would be when you are deciding whether to order a  
11 scan for pulmonary embolism, and might think of how a colleague has acted, or you might  
12 ask for advice.  
13  
14

15  
16 Patient centred: This refers to behaviours that affect patient experience, such as  
17 communication, reassurance, going 'the extra mile' to do something for a patient. An  
18 example might be a nurse asks you to speak to a patient who is anxious; it is not your patient  
19 and you are busy. Do you help? Perhaps you might be influenced by what you've seen others  
20 do, or perhaps you would ask advice?  
21  
22

23  
24 Self-organisation: The includes behaviours that impact on the efficiency, such as organising  
25 and prioritising your own work. An example would be ensuring all discharge documentation  
26 is done early in the day, to ensure that beds are freed. You might see someone else doing  
27 things a certain way, or might ask how others organise themselves.  
28  
29  
30  
31  
32  
33  
34  
35  
36  
37  
38  
39  
40  
41  
42  
43  
44  
45  
46  
47  
48  
49  
50  
51  
52  
53  
54  
55  
56  
57  
58  
59  
60

1  
2  
3 Survey questions: each question is presented with a list of all trainees in the team, with  
4 multiple selections permitted.  
5  
6  
7

8 Have you asked someone what to do in terms of something clinical, e.g. how to diagnose or  
9 treat a patient? If so, who?  
10

11 Have you ever approached a clinical problem a certain way because you had seen some one  
12 else do it a certain way? If so, who?  
13

14 If you had a question about a clinical problem, and everyone was available, are there people  
15 you would be likely to choose to ask?  
16  
17

18 Have you asked someone what to do in terms of something to do with providing good patient  
19 experience, If so, who?  
20

21 Have you ever approached an interaction with a patient patient experience problem a certain  
22 way because you had seen some one else do it a certain way, in order to provide good  
23 experience? If so, who?  
24  
25

26 If you wanted to know what to do in terms of an interaction with a patient, is there anybody  
27 you would seek out?  
28  
29

30 Have you asked a team member you should organise or prioritise a task, such as booking  
31 tests or doing paper work?  
32

33 Have you ever changed the way you organise or prioritise works tasks, for example, when in  
34 the day you do discharge documents, because you saw a colleague take a certain approach?  
35  
36  
37  
38  
39  
40  
41  
42  
43  
44  
45  
46  
47  
48  
49  
50  
51  
52  
53  
54  
55  
56  
57  
58  
59  
60

## Initial Interview guide

Sometimes, there are different ways of approaching a clinical problem, for example, should you do a scan, which choice of treatment should you use.

An example would be: Sometimes there is no evidence to support a decision; an example is, at what level of suspicion prompts investigation for pulmonary embolism. Some people are much more likely to order a scan in low risk cases. Others would avoid scanning when there is a very small likelihood of pulmonary embolism.

It might be that you take a certain approach because you've seen somebody else do it that way, or you might approach somebody from the team to ask advice; do you think that can happen?

Do you think there are some people you'd be more likely to copy, or ask?

Are there people who are particularly influential in this way?

Can you think about what it is about those people that makes you see them in that way?

Now thinking about ways you behave so as to produce good patient experience, an example behaviour would be: A nurse asks a doctor to review a patient in pain. The doctor is busy, and is not responsible for that patients. Some people will tell the nurse to call the relevant doctor. Some will take time to assess the patient and prescribe a pain killer.

Same questions

Now, thinking about ways you organise and prioritise the work you do away from patients. An example would be: Many people go through non patient facing tasks in an order that is easiest for them. You observe that one of your colleagues prioritises the tasks that will have the greatest benefit if done early, for example, preparing discharge documents so beds can be freed.

Same questions

Are there any other things you can think of about the way trainees in the team influence each other; and what makes someone especially influential?

## Standards for Reporting Qualitative Research (SRQR)

O'Brien B.C., Harris, I.B., Beckman, T.J., Reed, D.A., & Cook, D.A. (2014). Standards for reporting qualitative research: a synthesis of recommendations. *Academic Medicine*, 89(9), 1245-1251.

| No.                       | Topic                                                                                        | Item                                |
|---------------------------|----------------------------------------------------------------------------------------------|-------------------------------------|
| <b>Title and abstract</b> |                                                                                              |                                     |
| S1                        | Title                                                                                        | TITLE PAGE                          |
| S2                        | Abstract                                                                                     | PAGE 3                              |
| <b>Introduction</b>       |                                                                                              |                                     |
| S3                        | Problem formulation                                                                          | PAGE 4 LINES 11-53                  |
| S4                        | Purpose or research question                                                                 | PAGE 4 LINES 48-54                  |
| <b>Methods</b>            |                                                                                              |                                     |
| S5                        | Qualitative approach and research paradigm                                                   | PAGE 6 PAGES 34-51                  |
| S6                        | Researcher characteristics and reflexivity                                                   | PAGE 7 LINES 5-15                   |
| S7                        | Context                                                                                      | PAGE 5 LINES 20-26                  |
| S8                        | Sampling strategy                                                                            | PAGE 6 LINES 53-59                  |
| S9                        | Ethical issues pertaining to human subjects                                                  | PAGE 5 LINES 36-56                  |
| S10                       | Data collection methods                                                                      | PAGE 6 LINES 27-39 AND PAGE 9, 5-51 |
| S11                       | Data collection instruments and technologies                                                 | na                                  |
| S12                       | Units of study                                                                               | PAGE 6 LINES 8-19                   |
| S13                       | Data processing                                                                              | PAGE 7 LINES 44-51                  |
| S14                       | Data analysis                                                                                | ditto                               |
| S15                       | Techniques to enhance trustworthiness                                                        | PAGE 7 LINES 48-52                  |
| <b>Results/Findings</b>   |                                                                                              |                                     |
| S16                       | Synthesis and interpretation                                                                 | PAGE 8 LINE 11 and ff               |
| S17                       | Links to empirical data                                                                      | PAGE 9 LINE 12 and ff               |
| <b>Discussion</b>         |                                                                                              |                                     |
| S18                       | Integration with prior work, implications, transferability, and contribution(s) to the field | PAGE 14 LINE 27 and ff              |
| S19                       | Limitations                                                                                  | PAGE 16 LINE 29-43                  |

|                           |                            |
|---------------------------|----------------------------|
| <b>Other</b>              |                            |
| S20 Conflicts of interest | As per submission web page |
| S21 Funding               | As per submission web page |

<sup>a</sup>The rationale should briefly discuss the justification for choosing that theory, approach, method, or technique rather than other options available, the assumptions and limitations implicit in those choices, and how those choices influence study conclusions and transferability. As appropriate, the rationale for several items might be discussed together.

For peer review only
