# Supplementary material for: Diffusion of knowledge and behaviours among trainee doctors in an acute medical unit and implications for quality improvement work: a mixed methods social network analysis
Source: PubMed Central journal article supplement — BMJ Open. 2019 Dec 10;9(12):e027039. doi: 10.1136/bmjopen-2018-027039 (PMC6924864; doi:10.1136/bmjopen-2018-027039), 2019-12-10
Supplement: bmjopen-2018-027039supp002.pdf [file bmjopen-2018-027039supp002.pdf]

Survey questions: each question is presented with a list of all trainees in the team, with multiple selections permitted.

Have you asked someone what to do in terms of something clinical, e.g. how to diagnose or treat a patient? If so, who?

Have you ever approached a clinical problem a certain way because you had seen some one else do it a certain way? If so, who?

If you had a question about a clinical problem, and everyone was available, are there people you would be likely to choose to ask?

Have you asked someone what to do in terms of something to do with providing good patient experience, If so, who?

Have you ever approached an interaction with a patient patient experience problem a certain way because you had seen some one else do it a certain way, in order to provide good experience? If so, who?

If you wanted to know what to do in terms of an interaction with a patient, is there anybody you would seek out?

Have you asked a team member you should organise or prioritise a task, such as booking tests or doing paper work?

Have you ever changed the way you organise or prioritise works tasks, for example, when in the day you do discharge documents, because you saw a colleague take a certain approach?
